# Supplementary material for: The Role of Restriction-Modification Systems in the Horizontal Transfer of Carbapenem Resistance Genes in Klebsiella pneumoniae
Source: Research Square preprint supplement (doi:10.21203/rs.3.rs-7168145/v1), 2025-08-20
Supplement: Supplementary file 1 [file 12daf623ed81a656376d7f85.xlsx]

## Sheet: CRPA
Time	Genome	AMG	RM	Identification sites	Function
2022-03-07	GCA_022569875.1	OXA-486/PDC-3	NO
2020-05-19	GCA_013201115.1	OXA-847/PDC-1	NO
2022-04-24	GCA_023093935.1	OXA-395/KPC-3/VIM-2/PDC-3	NO
2022-08-14	GCA_024652945.1	OXA-486/PDC-8	NO
2022-03-15	GCA_022570415.1	OXA-848/PDC-16	N0
2021-09-09	GCA_019915485.1	OXA-488/PDC-19a	NO
2022-07-14	GCA_024266935.1	OXA-396/PDC-3	NO
2022-03-15	GCA_022570475.1	OXA-488/PDC-34	NO
2022-01-06	GCA_021378395.1	NDM-1/PDC-3	NO
2022-01-19	GCA_021513295.1	OXA-494/PDC-5	NO
2022-08-08	GCA_024584495.1	OXA-488/PDC-35/GES-1	NO
2022-03-15	GCA_022570115.1	OXA-485/PDC-19a	NO
2022-04-11	GCA_022870525.1	OXA-485/PDC-19a	NO
2022-08-24	GCA_024734795.1	OXA-10/OXA-846/PDC-11/VEB-9	NO
2022-04-24	GCA_023093975.1	OXA-488/KPC-2/PDC-35	NO
2022-03-21	GCA_022637915.1	OXA-486/PDC-8	NO
2022-01-18	GCA_021497305.1	OXA-395/CARB-53/PDC-3	NO
2022-08-03	GCA_024507955.1	OXA-396/PDC-5	I	CYYANNNNNNCTTC(S/M)	specificity subunit/methyltransferase
2022-01-18	GCA_021497345.1	OXA-847/PDC-1	NO
2021-12-30	GCA_021166295.2	OXA-851/PDC-8	NO
2021-07-28	GCA_019379355.1	OXA-486/KPC-2/PDC-8	NO
2022-05-07	GCA_023272755.1	OXA-847/PDC-1	NO
2022-03-28	GCA_022700635.1	OXA-486/PDC-3	NO
2021-12-15	GCA_021184265.1	OXA-4/PDC-16/VIM-2	I/II	YACNNNNNCTCC(S)/CTCGAG(IIR/M)	specificity subunit/restriction enzyme/methyltransferase
2022-01-19	GCA_021513675.1	OXA-486/PDC-1	NO
2021-12-21	GCA_021249245.1	OXA-851/PDC-5	NO
2022-07-25	GCA_024397355.1	OXA-488	NO
2022-03-03	GCA_022453825.1	OXA-488/PDC-30	NO
2021-08-02	GCA_019434175.1	OXA-50	NO
2022-05-04	GCA_023093955.2	OXA-488/KPC-2/PDC-35	NO
2021-11-06	GCA_020771755.1	OXA-10/PDC-5	NO
2021-05-05	GCA_018279245.1	OXA-4/PDC-3	NO
2021-11-27	GCA_020990445.1	VIM-5/PDC-35	NO
2021-12-15	GCA_021184245.1	OXA-101/PDC-1	NO
2021-11-15	GCA_018598285.3	OXA-56/SPM-1/PDC-5	NO
2021-09-24	GCA_006704595.2	OXA-935/OXA-848/PDC-16	NO
2021-08-23	GCA_019720855.1	OXA-494/PDC-5	NO
2021-08-22	GCA_019711215.1	OXA-10/PDC-3	NO
2021-03-18	GCA_017378395.1	OXA-914/PDC-5	NO
2021-06-22	GCA_018986715.1	OXA-395/PDC-36	NO
2021-08-09	GCA_019466095.1	OXA-486/PDC-122	NO
2020-11-30	GCA_015697465.1	OXA-396/PDC-5	NO
2021-07-23	GCA_019364615.1	OXA-494/IMP-45	NO
2021-12-29	GCA_021166275.2	OXA-494/PDC-147	NO
2021-08-02	GCA_019434095.1	OXA-486/PDC-5	NO
2022-03-27	GCA_022699505.1	OXA-937/PDC-31	I	CYYANNNNNNCTTC	specificity subunit/methyltransferase
2022-08-04	GCA_022213165.2	OXA-50/PDC-1	NO
2022-01-19	GCA_021513515.1	OXA-847/PDC-1	NO
2021-01-22	GCA_016745155.1	OXA-101/PDC-1	NO
2021-05-05	GCA_018279265.1	OXA-10/OXA-846/PDC-11/VEB-9	NO
GCA_021442005.1	KPC-2	ST11
GCA_021432125.1	KPC-2/OXA-1	ST617
GCA_021398155.1	NDM-1/KPC-2	ST11
GCA_021397585.1	KPC-2	ST15
GCA_021228815.1	OXA-1	ST2856
GCA_021166115.1	OXA-1/OXA-48/KPC-2	ST11
GCA_021166235.1	OXA-1/OXA-48	ST23
GCA_021166195.1	OXA-48	ST11
GCA_021166135.1	OXA-1/OXA-48	ST147
GCA_021137635.1	OXA-9/OXA-48	ST101
GCA_021135615.1	OXA-1/OXA-48	ST101
GCA_021137895.1	OXA-232	ST14
GCA_021137795.1	OXA-48	ST101
GCA_021137775.1	OXA-48	ST101
GCA_021138035.1	OXA-1/OXA-48	ST392
GCA_001718115.2	OXA-9	ST340
GCA_020991145.1	OXA-1 /KPC-2	ST617
GCA_020990405.1	NDM-1	ST37
GCA_018274525.2	OXA-10/OXA-1/NDM-1/OXA-48/OXA-1/KPC-2	ST39
GCA_020736285.1	KPC-33	ST11
GCA_020535145.1	NDM-1/KPC-2	ST2667
GCA_020520185.1	KPC-2	ST11
GCA_020405285.1	KPC-2	ST11
GCA_020221715.1	OXA-1	ST35
GCA_020215625.1	OXA-232	ST231
GCA_020172745.1	OXA-10	ST727
GCA_020023465.1	OXA-10	ST727
GCA_007955105.2	KPC-2	ST11
GCA_019823765.1	KPC-2	ST11
GCA_019793595.1	KPC-2	ST11
GCA_019444195.1	KPC-2 /NDM-1	ST11
GCA_019444635.1	KPC-2	ST11
GCA_019443545.1	OXA-1/OXA-48	ST16
GCA_019434255.1	KPC-2	ST11
GCA_019334545.1	OXA-232	ST15
GCA_019334705.1	OXA-181	ST231
GCA_019317085.1	OXA-1/OXA-10/OXA-9	ST14
GCA_019286375.1	OXA-1 /OXA-181	ST231
GCA_019107705.1	KPC-2	ST11
GCA_003937135.2	OXA-1/OXA-9/NDM-1	ST14
GCA_018885345.1	KPC-2	ST437
GCA_007421875.2	NDM-1	ST1967
GCA_018831545.1	KPC-2	ST11
GCA_018623335.1	OXA-48	ST147
GCA_018604385.1	NDM-1	ST11
GCA_018454365.1	KPC-2	ST2237
GCA_018336835.1	KPC-74	ST11
GCA_018314145.1	KPC-2/NDM-5	ST11
GCA_018279325.1	KPC-2 /OXA-48	ST11
GCA_018140905.1	KPC-2	ST11
GCA_018128465.1	NDM-1 /OXA-10/OXA-1	ST395
GCA_018075325.1	KPC-2	ST11
GCA_018075085.1	KPC-3/OXA-9	ST1583
GCA_001185665.3	KPC-3/OXA-9	ST309
GCA_014490685.2	OXA-1/NDM-1	ST147
GCA_017809835.1	KPC-2	ST11
GCA_017742955.1	OXA-232	ST231
GCA_017742895.1	OXA-1	ST35
GCA_017310425.1	OXA-48	ST147
GCA_017301375.1	OXA-1/OXA-48 /NDM-1	ST14
GCA_017084505.1	NDM-1	ST412
GCA_016939695.1	KPC-2	ST101
GCA_016939815.1	OXA-1/KPC-2	ST11
GCA_016925415.1	OXA-232	ST231
GCA_016812055.1	KPC-2/NDM-5	ST11
GCA_016804025.1	KPC-2	ST11
GCA_016801375.1	KPC-3	ST258
GCA_016800965.1	OXA-10	ST290
GCA_016774455.1	KPC-2	ST11
GCA_016772575.1	KPC-2	ST258
GCA_016772535.1	KPC-2	ST258
GCA_016403065.1	KPC-2	ST11
GCA_014041505.2	OXA-1/KPC-2	ST11
GCA_015992305.1	KPC-2/OXA-1	ST11
GCA_015992325.1	KPC-2	ST11
GCA_015992265.1	KPC-2	ST11
GCA_015992385.1	KPC-2	ST11
GCA_015774895.1	NDM-1	ST1128
GCA_015694085.1	OXA-1	ST29
GCA_015475915.1	OXA-1/KPC-2	ST846
GCA_015356055.1	KPC-2	ST11
GCA_015353095.1	NDM-5	ST340
GCA_015290985.1	OXA-1	ST23
GCA_015290925.1	OXA-1	ST1910*
GCA_015277755.1	KPC-2	ST11
GCA_015277915.1	OXA-1	ST1
GCA_015243235.1	KPC-2	ST11
GCA_015238895.1	KPC-2	ST11
GCA_015238555.1	KPC-2 /NDM-1	ST2667
GCA_904864465.1	OXA-10 /OXA-48	ST231
GCA_904863215.1	OXA-1	ST323
GCA_904866485.1	OXA-1	ST323
GCA_015074925.1	OXA-1 /OXA-48	ST23
GCA_014961485.1	KPC-2 /NDM-1	ST2667
GCA_009661535.2	OXA-1	ST395
GCA_014854815.1	KPC-2	ST11
GCA_014788765.1	OXA-1	ST25
GCA_014725775.1	KPC-2	ST86
GCA_014905815.1	NDM-5	ST11
GCA_012029945.2	KPC-3	ST258
GCA_012029975.2	KPC-3	ST258
GCA_012029695.2	KPC-3	ST14
GCA_012029935.2	KPC-3	ST13
GCA_012029895.2	KPC-3	ST37
GCA_014304835.1	KPC-2	ST65
GCA_014189335.1	OXA-204	ST1454
GCA_014170015.1	KPC-2/OXA-1	ST37
GCA_014123345.1	KPC-2	ST15
GCA_014108845.1	KPC-2	ST11
GCA_011682835.2	OXA-1	ST985
GCA_013694425.1	KPC-2 /VIM-1	ST147
GCA_013694405.1	NDM-1/OXA-1	ST147
GCA_014170935.1	OXA-10 /IMP-1	ST29
GCA_023920005.1	KPC-2	ST268
GCA_023657795.1	OXA-1	ST307
GCA_023657775.1	OXA-1	ST950
GCA_023573585.1	NDM-1	ST23
GCA_023538975.1	OXA-48	ST11
GCA_023025805.1	NDM-1/IMP-4	ST20
GCA_022701055.1	OXA-181	ST2096
GCA_021389995.1	NDM-5	ST2407
GCA_021137615.1	OXA-1/NDM-1	ST152
GCA_021057265.1	OXA-9	ST147
GCA_020906545.1	OXA-1	ST985
GCA_018283505.2	NDM-1	ST147
GCA_020023465.1	OXA-10	ST727
GCA_019454345.1	KPC-2	ST23
GCA_019107685.1	NDM-1	ST377
GCA_017310385.1	OXA-1	ST1393
GCA_014883955.1	KPC-2	ST504
GCA_014764345.1	NDM-1	ST37
GCA_014495785.1	OXA-181	ST147

## Sheet: CREC
Time	Genome	AMG	RM	Identification sites	Function
2022-08-23	GCA_024734095.1	OXA-1	II	CCWGG/ATGCAT
2021-02-01	GCA_016776325.1	OXA-244/CTX-M-14/TEM-1	I/II	GGANNNNNNCTTT/ATGCAT/CCWGG
2021-08-01	GCA_019431185.1	CMY-2/TEM-1	I/II	GAANNNNNNNRTCG（Ir）/GAGNNNNNNTGAY（Im）/CCWGG/GATC/ATGCAT
2021-02-01	GCA_016776385.1	OXA-48/CTX-M-24/TEM-1	II	CCWGG/GATC/ATGCAT
2021-09-09	GCA_019915525.1	OXA-1/CTX-M-15	I/II	AGCANNNNNNTGA/CCWGG/GGTCTC(IIR)/ATGCAT
2021-11-18	GCA_020883295.1	OXA-244	I/II	GGANNNNNNCTTT（Im）/CCWGG/ATGCAT
2022-01-18	GCA_021498145.1	OXA-1/CTX-M-15	I/II/VI	CCANNNNNNNCTTC/YTCANNNNNNGTTY（S）/AACNNNNNNGTGC/GAANNNNNNNRTCG/（R）/CCANNNNNNNCTTC/GAANNNNNNRTCG/GGANNNNNNCTTT/CCWGG/ATGCAT
2021-02-01	GCA_016779865.1	OXA-48/CTX-M-24	II	CCWGG/ATGCAT
2021-03-09	GCA_017310445.1	OXA-48/CTX-M-14	I/II/VI	GATGNNNNNNTAC/CCANNNNNNNCTTC（S）/AACNNNNNNGTGC（R）/GATGNNNNNNTA/GGANNNNNNCTTT/GATGNNNNNNTAC/CCWGG/GATC
2021-11-24	GCA_020971745.1	OXA-244/CTX-M-27	I/II	GGANNNNNNCTTT（Im）/CCWGG/ATGCAT
2022-05-31	GCA_023612455.1	OXA-48	I/II/VI	AACNNNNNNGTGC(IR/M)/CCWGG/ATGCAT
2021-08-31	GCA_019973815.1	OXA-1/CTX-M-15/OXA-48/TEM-1	I/II	GATGNNNNNCTG(I/M/R)/CCWGG/ATGCAT/GATC
2022-05-24	GCA_905330065.2	OXA-48/TEM-30	I/II	GATGNNNNNCTG(I/M/S)/CCWGG/ATGCAT/GATC
2022-05-24	GCA_905330875.2	OXA-1/OXA-48	I/II	AGCANNNNNNTGA(IM)/GGTCTC(IIR)/CCWGG/ATGCAT/GATC
2021-04-19	GCA_018075305.1	KPC-2/CTX-M-27/CTX-M-3/TEM-1	I/II	AGCANNNNNNTGA/GAANNNNNNNTAAA(IM)/GGTCTC(IIR/M)/CCWGG(IIR/M)/ATGCAT/GATC
2021-10-25	GCA_905332355.1	OXA-48	I/II	GAGNNNNNGTTY(I/s/m)/GGANNNNNNNNATGC(I/r/s/m)/CCWGG/ATGCAT/GATC
2022-08-08	GCA_024585985.1	CMY-2	I/II	GATGNNNNNNTAC(IS/M)/YTCANNNNNNGTTY(IS/M)/CCWGG/ATGCAT
2021-12-17	GCA_916098155.1	OXA-48/TEM-1	II	CCWGG/ATGCAT/GATC
2022-03-18	GCA_023169585.1	NDM-5/TEM-1	I/II	CCANNNNNNNCTTC(IM)/AACNNNNNNGTGC(r)/CCWGG/ATGCAT
2022-05-31	GCA_023612415.1	OXA-48	I/II	AGCANNNNNNTGA/GGANNNNNNCTTT/CCWGG/ATGCAT
2022-08-06	GCA_024579775.1	NDM-1/CTX-M-15/TEM-30	I/II	AGCANNNNNNTGA(Im)/GGTCTC(IIR)/CCWGG/ATGCAT/GATC
2022-08-03	GCA_024508155.1	OXA-48/TEM-1	II	CCWGG/ATGCAT/GATC
2021-10-25	GCA_905332365.1	OXA-48	I/II	GAGNNNNNGTTY(ISM)/GGANNNNNNNNATGC(ISMR)/CCWGG/ATGCAT/GATC
2022-02-22	GCA_022353925.1	CMY-2	I/II	GATGNNNNNNTAC(IS/M)/YTCANNNNNNGTTY(IS/M)/CCWGG/ATGCAT
2021-12-19	GCA_021228975.1	OXA-1/CTX-M-15/KPC-2/TEM-1/SHV-12	I/II	AACNNNNNNGTGC(IM)/CCWGG/ATGCAT/GGTCTC(IIR/M)/GATG
2022-03-14	GCA_022559045.1	NDM-5/EC-8	I/II/VI	AACNNNNNNGTGC(Ir)/CCANNNNNNNCTTC(IS/M)/CCWGG/ATGCAT
2021-06-08	GCA_018771585.1	NDM-5/TEM-1	I/II/VI	AACNNNNNNGTGC/GAANNNNNNNRTCG(Ir/m)/CCANNNNNNNCTTC(IS/M)//CCWGG/ATGCAT
2022-07-13	GCA_024224055.1	SHV-12	I/II	GAGNNNNNNNGTCA/GAANNNNNNNRTCG(IR)/CACNNNNNNNGTTG/GAGNNNNNNTGAY(IM)/CCWGG/ATGCAT
2021-11-10	GCA_020827575.1	CMY-2	I/II/VI	AACNNNNNNGTGC(IM)/CCANNNNNNNCTTC(IM/S)/CCWGG/ATGCAT
2022-05-25	GCA_023546865.1	CTX-M-27/TEM-1	II	GGTCTC(IIM/R)/CCWGG/ATGCAT
2022-06-24	GCA_905330895.2	OXA-48/TEM-1	I/II	AGCANNNNNNTGA/GAANNNNNNRTCG(IM)/GGTCTC(IIM/R)/CCWGG/ATGCAT
2022-01-24	GCA_021559875.1	OXA-1/CTX-M-15	I/II	AGCANNNNNNTGA/GGTCTC(IIM/R)/CCWGG/ATGCAT
2020-04-19	GCA_012516455.1	NDM-5/TEM-1/CTX-M-65	I/II	GAGNNNNNNTGAY/CCWGG/ATGCAT/GATC
2021-07-27	GCA_019355455.1	OXA-1	I/II/VI	GAGNNNNNNTGAY/GAANNNNNNNTAAA/GAGNNNNNNTGAY/CCANNNNNNNCTTC(ISM)/CCWGG/ATGCAT
2021-11-16	GCA_020881875.1	CMY-2	I/II	AGCANNNNNNTGA/CCWGG/ATGCAT
2022-02-23	GCA_022368895.1	CMY-2/OXA-10/CTX-M-65	II	CCWGG/ATGCAT
2022-02-22	GCA_022353905.1	CMY-2/TEM-1	I/II	YTCANNNNNNGTTY(IS/M)/CCWGG/ATGCAT
2021-10-21	GCA_020540945.1	OXA-1/CTX-M-15/NDM-5	II	CCWGG/ATGCAT
2021-04-09	GCA_006536085.3	CMY-2/EC-15	I/II	YTCANNNNNNGTTY(IS/M)/CCWGG/ATGCAT
2021-09-22	GCA_020091645.1	CMY-2/NDM-5/TEM-1	I/II	YTCANNNNNNGTTY(IS/M)/CCWGG/ATGCAT
2022-05-24	GCA_905332395.2	OXA-48/TEM-1	II/IIG	ACCYAC(IIG/R/M)/CCWGG/ATGCAT
2020-12-10	GCA_015910185.1	VIM-1/SHV-12	II	GGTCTC(IIM/R)/CCWGG/ATGCAT
2020-07-21	GCA_014169595.1	OXA-10/CTX-M-55	II	CCWGG/ATGCAT
2020-06-29	GCA_013376575.1	NDM-1/CTX-M-15/TEM-1	II	CCWGG/ATGCAT/GATC
2020-07-20	GCA_013426115.1	NDM-1	I/II	GAANNNNNNNRTCG(IR/M)/CCWGG/ATGCAT
2020-06-17	GCA_013374255.1	OXA-1/CTX-M-15/NDM-5	I/II	YTCANNNNNNGTTY(IS/M)/CCWGG/ATGCAT
2020-12-29	GCA_016432805.1	OXA-1/CTX-M-15/OXA-181/TEM-1	II	CCWGG/ATGCAT
2020-06-10	GCA_013317085.1	OXA-1/CTX-M-15/NDM-1/TEM-1	I/II	GAANNNNNNRTCG(IM/R)/GAGNNNNNNNGTCA（Im/r）/GGANNNNNNNNATGC（Im）/CCWGG/ATGCAT/GATC
2021-10-26	GCA_020616495.1	CMY-2//CTX-M-14	I/II	YTCANNNNNNGTTY/GAANNNNNNNRTCG(IS/M)/CCWGG/ATGCAT
2021-08-30	GCA_019802685.1	CMY-2/TEM-1	I/II	YTCANNNNNNGTTY(IM/S)/TCANNNNNNNRTTC(IS)/GAANNNNNNNRTCG(IM)/CCWGG/ATGCAT

## Sheet: CRAB
Time	Genome	AMG	RM	Identification sites	Function
2021-11-22	GCA_020911985.1	OXA-98	NO
2022-04-11	GCA_022870045.1	OXA-98	NO
2022-05-13	GCA_023360975.1	OXA-23/OXA-66	I/II	AGCANNNNNNTGA（Im）/GGTCTC(IIM/R)/CCWGG/ATGCAT/GATC	restriction enzyme(II)/methyltransferase(I/II)
2022-07-05	GCA_024139035.1	OXA-65/OXA-23/TEM-1	NO
2022-06-28	GCA_023981045.1	OXA-23/OXA-68	NO
2022-05-23	GCA_023517195.1	OXA-23/OXA-66	NO
2021-06-09	GCA_018808925.1	OXA-64	NO
2022-02-03	GCA_021899715.1	OXA-64	NO
2022-01-26	GCA_021609965.1	OXA-23/OXA-69	NO
2022-05-13	GCA_023361075.1	OXA-23/TEM-1	NO
2021-04-03	GCA_017724155.1	OXA-104/OXA-23	NO
2021-02-11	GCA_016864295.1	OXA-90/OXA-23/CTX-M-115	NO
2021-08-06	GCA_019457715.1	OXA-23/OXA-64	NO
2021-04-04	GCA_017742855.1	OXA-23/OXA-104/PER-7	NO
2021-11-16	GCA_017098205.2	OXA-23/OXA-66/TEM-1	NO
2022-05-13	GCA_023360995.1	OXA-66/TEM-1	NO
2021-02-11	GCA_016864915.1	OXA-90/OXA-72/CTX-M-115	NO
2022-01-24	GCA_021559695.1	OXA-23/TEM-1	NO
2022-07-25	GCA_024426665.1	OXA-64	NO
2022-01-30	GCA_021725415.1	OXA-23/OXA-66/TEM-1	NO
2022-05-13	GCA_023361995.1	OXA-23/OXA-66/TEM-2	NO
2022-06-20	GCA_023809705.1	OXA-64/OXA-58/NDM-1	NO
2021-03-30	GCA_017639875.1	OXA-23/OXA-104/PER-7	NO
2022-03-30	GCA_022759565.1	OXA-23/OXA-66/TEM-1	NO
2021-08-08	GCA_019458485.1	OXA-23/OXA-69	NO
2021-06-10	GCA_018831125.1	OXA-23/OXA-64	NO
2021-11-09	GCA_020810655.1	OXA-565/OXA-10/OXA-769	NO
2022-01-31	GCA_021729465.1	OXA-735	NO
2020-12-10	GCA_015910475.1	OXA-98	NO
2021-01-30	GCA_016865465.1	OXA-23/OXA-66/TEM-1	NO
2021-09-24	GCA_020132105.1	OXA-94	NO
2022-05-23	GCA_023517235.1	OXA-23/OXA-879	NO
2021-10-18	GCA_020520405.1	OXA-66	NO
2022-08-22	GCA_024730805.1	OXA-23/OXA-66/TEM-1	NO
2022-07-05	GCA_024139075.1	OXA-23/OXA-219/TEM-1	NO
2021-06-01	GCA_018604365.1	OXA-23	NO
2022-01-31	GCA_021730415.1	OXA-23/OXA-66	NO
2022-07-05	GCA_024139015.1	OXA-67/OXA-58	NO
2021-11-21	GCA_020906565.1	OXA-58/OXA-201	NO
2021-11-22	GCA_020912005.1	OXA-259	NO
2022-04-12	GCA_022921035.1	OXA-23/OXA-66/TEM-1	NO
2021-10-05	GCA_020271605.1	OXA-873/OXA-58	NO
2021-11-25	GCA_020985285.1	OXA-69	NO
2022-05-23	GCA_023517735.1	OXA-23/TEM-1	NO
2022-04-04	GCA_022811905.1	OXA-402	NO
2022-07-11	GCA_024205285.1	OXA-69	NO
2021-09-15	GCA_019997865.1	OXA-120	NO
2021-09-08	GCA_019903175.1	OXA-762	NO
2021-04-05	GCA_017753625.1	OXA-424/OXA-58	NO
2022-08-02	GCA_024505625.1	NDM-1	NO
