# Supplementary material for: The Role of Restriction-Modification Systems in the Horizontal Transfer of Carbapenem Resistance Genes in Klebsiella pneumoniae
Source: Research Square preprint supplement (doi:10.21203/rs.3.rs-7168145/v1), 2025-08-20
Supplement: Supplementary file 2 [file 5db0ab082b530b86e29fceeb.xlsx]

## Sheet: Sheet1
Genome sequences	Gene name	Plasmid	Plasmid incompatibility type	MLST
GCA_023913595.1	KPC-2	CP099415.1	INFII	ST11
GCA_023913575.1	KPC-2	CP099411.1	INFIA	ST252
GCA_023913555.1	KPC-2	CP099406.1	INFIA	ST252
GCA_023658225.1	OXA-9/KPC-3	CP098353.1	INFIIY	ST258
GCA_023658245.1	KPC-2	CP098358.1	INFIIK	ST258
GCA_023658165.1	KPC-2	CP098346.1	INFIIK	ST258
GCA_023653925.1	KPC-2	CP072557.1	INFII	ST11
GCA_023573825.1	KPC-2	CP097693.1	INFII	ST11
GCA_023572965.1	KPC-2	CP097627.1	INFII	ST11
GCA_023573845.1	KPC-2	CP097695.1	INFII	ST11
GCA_023573665.1	KPC-2	CP097659.1	INFII	ST11
GCA_023518315.1	OXA-1	CP067371.1	INFIIK	ST11
GCA_023518335.1	OXA-1	CP067373.1	FIIS	ST985
GCA_903993065.2	OXA-1/NDM-1	OW970375.1	INFIIK	ST101
GCA_023374225.1	OXA-9	CP097221.1	FIA	ST14
GCA_023374165.1	OXA-1/OXA-9/NDM-1	CP097233.1/CP097235.1	FIA/ smr0199	ST14
GCA_023347685.1	OXA-1/KPC-2	CP091331.1/CP091332.1	INFIIK	ST15
GCA_023184535.1	OXA-181/OXA-10/KPC-78	CP095779.1/CP095777.1/CP095778.1	ParB/INFIIK/INFIIK	ST512
GCA_023066785.1	KPC-2	CP087660.1	INFII	ST11
GCA_022870805.1	OXA-1/NDM-1	CP087274.1	ParA/B/RepA	ST11
GCA_022870645.1	KPC-2	CP064771.1	RepA	ST15
GCA_022828525.1	KPC-2	CP087144.1	INFII	ST11
GCA_018283575.2	KPC-2/OXA-1/OXA-10/OXA-48/NDM-1	CP094994.1/CP094993.1/CP094992.1	ParA/B/RepA/smr0199/INFIIK	ST39
GCA_022809675.1	KPC-2	CP094453.1	INFII	ST11
GCA_022759925.1	OXA-10/OXA-48	CP086440.1/CP086443.1	ParA/B/RepA/ParB	ST101
GCA_022760005.1	OXA-10/NDM-1	CP086448.1	ParA/B/RepA	ST101
GCA_022699325.1	OXA-1/NDM-1	CP093857.1	INFIB/INFIIK/INFIIY	ST2943
GCA_022592735.1	KPC-2	CP091049.1	smr0199	ST464
GCA_022570755.1	KPC-2/OXA-10	CP093153.1/CP093152.1	INFII/INFIIK	ST25
GCA_022558365.1	KPC-2	CP073003.1	INFII	ST11
GCA_022539425.1	OXA-1/NDM-1	CP092902.1/CP092904.1	smr0199/parB	ST1
GCA_022533525.1	KPC-2	CP092795.1	INFII	ST11
GCA_022492875.1	KPC-3	CP092761.1	INFIIK	ST512
GCA_022453645.1	KPC-2/NDM-1	CP092655.1/CP092653.1	korA/repN/traJ/smr0199	ST11
GCA_022453565.1	NDM-5	CP092650.1	parB	ST17
GCA_022354525.1	OXA-232	CP092341.1	parB	ST15
GCA_022354365.1	OXA-1	CP055211.1	INFIIK	ST15
GCA_022354665.1	OXA-10	CP055108.1	INFIA/repN	ST661
GCA_022353525.1	OXA-1	CP055163.1	INFIA	ST709
GCA_022213405.2	NDM-1	CP091986.1	smr0199	ST11
GCA_022059905.1	KPC-2/NDM-1	CP091849.1/CP091847.1	korA/repN/traJ/smr0199	ST11
GCA_021899755.1	OXA-1/NDM-1	CP091602.1	smr0199	ST14
GCA_021729925.1	OXA-1	CP063879.1	INFIIK	ST101
GCA_021560095.1	KPC-2	CP091070.1	INFII	ST11
GCA_021497485.1	KPC-71	CP066153.1	INFII	ST11
GCA_021496095.1	OXA-9/KPC-2	CP090932.1	smr0199	ST340
GCA_021484985.1	KPC-3	CP090624.1	INFIIK	ST512
GCA_021464465.1	KPC-2	CP073352.1	INFII	ST11
GCA_021442065.1	KPC-2	CP090464.1	INFII	ST11
GCA_021441845.1	NDM-1	CP090430.1	ParA/B/RepA	ST25
GCA_021442005.1	KPC-2	CP090434.1	INFII	ST11
GCA_021432125.1	KPC-2/OXA-1	CP090395.1/CP090394.1	INFIIK/INFIIK	ST617
GCA_021398155.1	NDM-1/KPC-2	CP090205.1/CP090204.1	ParA/B/RepA/INFII	ST11
GCA_021397585.1	KPC-2	CP090127.1	A005	ST15
GCA_021228815.1	OXA-1	CP089384.1	INFIIK	ST2856
GCA_021166115.1	OXA-1/OXA-48/KPC-2	CP088995.1	INFII	ST11
GCA_021166235.1	OXA-1/OXA-48	CP089029.1/CP089027.1	INFIIY/parA	ST23
GCA_021166195.1	OXA-48	CP089016.1	parA	ST11
GCA_021166135.1	OXA-1/OXA-48	CP089008.1	parA	ST147
GCA_021137635.1	OXA-9 /OXA-48 CP083077.1	CP083077.1	parA	ST101
GCA_021135615.1	OXA-1 CP082971.1/OXA-48	CP082971.1/CP082969.1	korA/parA	ST101
GCA_021137895.1	OXA-232	CP083050.1	parB	ST14
GCA_021137795.1	OXA-48	CP083022.1	INFIA	ST101
GCA_021137775.1	OXA-48	CP083017.1	INFIA	ST101
GCA_021138035.1	OXA-1/OXA-48	CP083072.1/CP083073.1	INFIIK/INFIB	ST392
GCA_001718115.2	OXA-9	CP089428.1	smr0199	ST340
GCA_020991145.1	OXA-1 CP087708.1/KPC-2 CP087707.1	CP087708.1/CP087707.1	INFIIK	ST617
GCA_020990405.1	NDM-1	CP087671.1	INFIA	ST37
GCA_018274525.2	OXA-10/OXA-1 /NDM-1 CP086666.1/OXA-48/OXA-1 CP086665.1 /KPC-2 CP086668.1 INFIIK	CP086665.1/CP086666.1/CP086668.1	ParA/B/RepA/INFIIK	ST39
GCA_020736285.1	KPC-33	CP085890.1	INFII	ST11
GCA_020535145.1	NDM-1 CP084987.1/KPC-2 CP084988.1 FIIY	CP084987.1	FIB/FIIY	ST2667
GCA_020520185.1	KPC-2	CP084707.1	INFII	ST11
GCA_020405285.1	KPC-2	CP084498.1	INFII	ST11
GCA_020221715.1	OXA-1	CP084169.1	INFIIK	ST35
GCA_020215625.1	OXA-232	CP084047.1	parB	ST231
GCA_020172745.1	OXA-10	CP072457.1	INFIA	ST727
GCA_020023465.1	OXA-10	CP072461.1	INFIA	ST727
GCA_007955105.2	KPC-2	CP082767.1	INFII	ST11
GCA_019823765.1	KPC-2 CP082003.1	CP082003.1	INFII	ST11
GCA_019793595.1	KPC-2	CP081821.1	INFII	ST11
GCA_019444195.1	KPC-2 CP078123.1 INFII/NDM-1 CP078125.1 korA	CP078123.1	korA/INFII	ST11
GCA_019444635.1	KPC-2	CP040835.1	INFII	ST11
GCA_019443545.1	OXA-1 CP080359.1 INFIIK/OXA-48 CP080360.1 INFIB	CP080359.1		ST16
GCA_019434255.1	KPC-2	CP080311.1	INFII	ST11
GCA_019334545.1	OXA-232	CP079730.1	parB	ST15
GCA_019334705.1	OXA-181	CP079811.1	parB	ST231
GCA_019317085.1	OXA-1/ OXA-10/OXA-9 CP079631.1 INFII OXA-9 CP079632.1 INFIA	CP079631.1	INFII	ST14
GCA_019286375.1	OXA-1 CP079116.1 INFII/INFIA/OXA-181 CP079118.1 ParB	CP079116.1/CP079118.1		ST231
GCA_019107705.1	KPC-2	CP077777.1	INFII	ST11
GCA_003937135.2	OXA-1/OXA-9/NDM-1	CP078034.1	smr0199	ST14
GCA_018885345.1	KPC-2	CP076521.1	RepN	ST437
GCA_007421875.2	NDM-1	CP054399.1	INFIA	ST1967
GCA_018831545.1	KPC-2	CP058228.1	INFII	ST11
GCA_018623335.1	OXA-48 CP076010.1 FIB	CP076010.1	INFIB	ST147
GCA_018604385.1	NDM-1 CP075892.1 ParB	CP075892.1	parB	ST11
GCA_018454365.1	KPC-2	CP075318.1	INFIIK	ST2237
GCA_018336835.1	KPC-74	CP055296.1	INFII	ST11
GCA_018314145.1	KPC-2 CP074118.1 INFII/NDM-5 CP074117.1 FIB	CP074117.1		ST11
GCA_018279325.1	KPC-2 CP065952.1/OXA-48 CP065954.1 INFIB	CP065952.1	INFII	ST11
GCA_018140905.1	KPC-2	CP073303.1	INFII	ST11
GCA_018128465.1	NDM-1 /OXA-10/OXA-1 CP071087.1 FIA			ST395
GCA_018075325.1	KPC-2	CP073001.1	A010	ST11
GCA_018075085.1	KPC-3/OXA-9	CP072951.1	INFIIY	ST1583
GCA_001185665.3	KPC-3/OXA-9	CP073055.1	INFIB	ST309
GCA_014490685.2	OXA-1/NDM-1	CP072906.1	INFIB	ST147
GCA_017809835.1	KPC-2	CP072465.1	INFII	ST11
GCA_017742955.1	OXA-232	CP072406.1	parB	ST231
GCA_017742895.1	OXA-1	CP072423.1	INFIIK	ST35
GCA_017310425.1	OXA-48	CP061978.1	FIB	ST147
GCA_017301375.1	OXA-1/OXA-48 CP071281.1 parB/NDM-1 CP071280.1 smr0199			ST14
GCA_017084505.1	NDM-1	CP070900.1	INFIIK、korA(IncN)	ST412
GCA_016939695.1	KPC-2	CP070565.1	INFIIK/INFIA	ST101
GCA_016939815.1	OXA-1/KPC-2	CP070594.1	IncN	ST11
GCA_016925415.1	OXA-232	CP070461.1	parB(IncA/C)	ST231
GCA_016812055.1	KPC-2 /NDM-5 INCI1	CP069172.1	INFII/ INCI1	ST11
GCA_016804025.1	KPC-2	CP053017.1	INFII	ST11
GCA_016801375.1	KPC-3	CP069050.1	NO	ST258
GCA_016800965.1	OXA-10	CP068975.1	yacAB	ST290
GCA_016774455.1	KPC-2	CP068687.1	INFII	ST11
GCA_016772575.1	KPC-2	CP068617.1	RepN(IncN)	ST258
GCA_016772535.1	KPC-2	CP068609.1	RepN(IncN)	ST258
GCA_016403065.1	KPC-2	CP066251.1	INFII	ST11
GCA_014041505.2	OXA-1 CP066535.1 INFIIK/KPC-2 CP066536.1 INFII	CP066535.1/CP066536.1		ST11
GCA_015992305.1	KPC-2 CP065461.1 INFII/OXA-1 CP065462.1 INFIIK	CP065461.1		ST11
GCA_015992325.1	KPC-2	CP065466.1	INFII	ST11
GCA_015992265.1	KPC-2	CP065445.1	INFII	ST11
GCA_015992385.1	KPC-2	CP065440.1	INFII	ST11
GCA_015774895.1	NDM-1	CP065342.1	INFIB/INFIIY	ST1128
GCA_015694085.1	OXA-1	CP065168.1	INFIIK	ST29
GCA_015475915.1	OXA-1/KPC-2	CP064297.1	INFIIK	ST846
GCA_015356055.1	KPC-2	CP064253.1 KPC-2 INFII	INFII	ST11
GCA_015353095.1	NDM-5	CP064177.1	A175 IncA/C	ST340
GCA_015290985.1	OXA-1 CP028851.1 smr0199 IncHI2		IncHI2	ST23
GCA_015290925.1	OXA-1	CP063946.1	INFIIK	ST1910*
GCA_015277755.1	KPC-2	CP063835.1	INFII	ST11
GCA_015277915.1	OXA-1	CP063859.1	INFIIK	ST1
GCA_015243235.1	KPC-2	CP063761.1	INFII	ST11
GCA_015238895.1	KPC-2	CP050345.1	INFII	ST11
GCA_015238555.1	KPC-2 CP063749.1 INFIIY/NDM-1 CP063748.1 smr0199	CP063748.1	IncHI2	ST2667
GCA_904864465.1	OXA-10 LR890428.1 INcA/C/OXA-48 LR890431.1 FIB			ST231
GCA_904863215.1	OXA-1	LR890205.1	INFIIK	ST323
GCA_904866485.1	OXA-1	LR890723.1	INFIIK	ST323
GCA_015074925.1	OXA-1 CP063279.1/OXA-48 CP063280.1 NO	CP063279.1	INFIIK	ST23
GCA_014961485.1	KPC-2 CP063148.1/NDM-1 CP063149.1 Smr0199 IncHI2	CP063148.1	INFIIY	ST2667
GCA_009661535.2	OXA-1	CP063020.1	INFII	ST395
GCA_014854815.1	KPC-2	CP031936.1	INFII	ST11
GCA_014788765.1	OXA-1 CP061833.1	CP061833.1	INFIIK	ST25
GCA_014725775.1	KPC-2	CP061353.1	HCM1 IncHI1	ST86
GCA_014905815.1	NDM-5	AP023454.1	INFII	ST11
GCA_012029945.2	KPC-3	CP061398.1	HCM1 IncHI1	ST258
GCA_012029975.2	KPC-3 CP061401.1 FIA	CP061401.1	FIA	ST258
GCA_012029695.2	KPC-3	CP061394.1	HCM1 IncHI1	ST14
GCA_012029935.2	KPC-3	CP061406.1	INFIIK	ST13
GCA_012029895.2	KPC-3	CP061382.1	INFIIY	ST37
GCA_014304835.1	KPC-2	CP060284.1	HCM1 IncHI1	ST65
GCA_014189335.1	OXA-204	CP047272.1	INCA/C	ST1454
GCA_014170015.1	KPC-2 CP054288.1 HCM1/OXA-1 CP054287.1 FIA/FIIK			ST37
GCA_014123345.1	KPC-2	CP059890.1	INFII	ST15
GCA_014108845.1	KPC-2	CP048414.1	INFII	ST11
GCA_011682835.2	OXA-1	CP059380.1	INFIIS	ST985
GCA_013694425.1	KPC-2 CP059315.1 INFIIK/VIM-1 CP059314.1	CP059314.1	RepN IncN/INFIIK	ST147
GCA_013694405.1	NDM-1/OXA-1	CP059311.1	smr0199 IncHI2	ST147
GCA_014170935.1	OXA-10 AP022080.1 IncA/C/IMP-1 AP022081.1 IncN	AP022080.1	IncN	ST29
GCA_023920005.1	KPC-2	CP082209.1	INFIIY	ST268
GCA_023657795.1	OXA-1	CP098160.1	parB(IncA/C)	ST307
GCA_023657775.1	OXA-1	CP098155.1	IncHI2	ST950
GCA_023573585.1	NDM-1	CP097653.1	parB(IncA/C)	ST23
GCA_023538975.1	OXA-48	CP097422.1	A059 IncA/C	ST11
GCA_023025805.1	NDM-1/IMP-4	CP086762.1	korA IncN	ST20
GCA_022701055.1	OXA-181	CP069207.1	parB(IncA/C)	ST2096
GCA_021389995.1	NDM-5	CP089991.1	parB(IncA/C)	ST2407
GCA_021137615.1	OXA-1/NDM-1	CP082976.1	smr0199 IncHI2	ST152
GCA_021057265.1	OXA-9	CP084985.1	RepN(IncN)	ST147
GCA_020906545.1	OXA-1	CP086725.1	INFIIS	ST985
GCA_018283505.2	NDM-1	CP084395.1	smr0199 IncHI2	ST147
GCA_020023465.1	OXA-10	CP072461.1	FIA IncF	ST727
GCA_019454345.1	KPC-2	CP067062.1	A010 IncA/C	ST23
GCA_019107685.1	NDM-1	CP077784.1	IncHI2	ST377
GCA_017310385.1	OXA-1	CP061966.1	INFII	ST1393
GCA_014883955.1	KPC-2	CP062794.1	Traj (IncN)	ST504
GCA_014764345.1	NDM-1	CP061701.1	smr0199 /IncHI2	ST37
GCA_014495785.1	OXA-181	CP061063.1	ParB IncA/C	ST147
