# Supplementary material for: The Role of Restriction-Modification Systems in the Horizontal Transfer of Carbapenem Resistance Genes in Klebsiella pneumoniae
Source: Research Square preprint supplement (doi:10.21203/rs.3.rs-7168145/v1), 2025-08-20
Supplement: Supplementary file 3 [file eb1b8f5b78a0af571adaf035.xlsx]

## Sheet: Sheet1
	Genome	Area	Time	RM	Identification sites	Function	Antibiotic genes
1	GCA_024224875.1	Switzerland	13-Jul-2022	II	CCWGG	methyltransferase	SHV-11/SHV-12
2	GCA_024226755.1	Switzerland	13-Jul-2022	II/III	CCWGG/CGCATC	methyltransferase	SHV-45/SHV-12
3	GCA_024223795.1	Switzerland	13-Jul-2022	II/III	CCWGG/CGCATC	methyltransferase	SHV-27/SHV-12
4	GCA_024138975.1	Australia	2022-07-05	II	CCWGG	methyltransferase	_
5	GCA_024138415.1	Henan	2022-07-05	II	CCWGG	methyltransferase	SHV-1/CTX-M-3/TEM-1
6	GCA_024081805.1	Hong Kong	2022-06-30	II	CCWGG	methyltransferase	N
7	GCA_023920065.1	Beijing	2022-06-27	II	CCWGG	methyltransferase	SHV-11
8	GCA_023920045.1	Beijing	2022-06-27	II	CCWGG	methyltransferase	SHV-11
9	GCA_023920005.1	Beijing	2022-06-27	II	CCWGG	methyltransferase	SHV-11/KPC-2
10	GCA_023920025.1	Beijing	2022-06-27	II	CCWGG	methyltransferase	SHV-28
11	GCA_023920325.1	Japan	2022-06-27	II	CCWGG	restriction enzyme/methyltransferase	SHV-11/OXA-48/OXA-1/CTX-M-15/TEM-1
12	GCA_023913595.1	Zhejiang	2022-06-26	II	CCWGG	methyltransferase	SHV-11/KPC-2/LAP-2/CTX-M-65/TEM-1
13	GCA_023913575.1	Zhejiang	2022-06-26	I/II	GATGNNNNNCTG/CCWGG/CGCATC	restriction enzyme(II)/methyltransferase(I/II)	SHV-11/KPC-2/DHA-1/TEM-1
14	GCA_023913555.1	Zhejiang	2022-06-26	I/II	GATGNNNNNCTG/CCWGG/CGCATC	restriction enzyme(II)/methyltransferase(I/II)	SHV-1/KPC-2/TEM-1
15	GCA_023715985.1_	Beijing	2022-06-14	II	CCWGG	methyltransferase	SHV-11/SHV-12
16	GCA_023715965.1	Beijing	2022-06-14	II	CCWGG	methyltransferase	SHV-11
17	GCA_023716445.1	Beijing	2022-06-14	II	CCWGG	methyltransferase	SHV-1
18	GCA_023703935.1	Australia	2022-06-13	II	CCWGG	methyltransferase	SHV-27
19	GCA_023703855.1	Australia	2022-06-13	II	CCWGG	methyltransferase	SHV-11
20	GCA_023703915.1	Australia	2022-06-13	I/II	GATGNNNNNCTG/CCWGG	restriction enzyme(I)/methyltransferase(I/II)	SHV-110
21	GCA_023703835.1	Australia	2022-06-13	I/II	CCAYNNNNNTCC(I)/CCWGG	specificity subunit(I)/restriction enzyme(II)/methyltransferase(I/II)	SHV-1
22	GCA_023703875.1	Australia	2022-06-13	II	CCWGG	methyltransferase	SHV-1
23	GCA_023703895.1_	Australia	2022-06-13	II	CCWGG	methyltransferase	SHV-1
24	GCA_023704015.1	Australia	2022-06-13	II	CCWGG	restriction enzyme/methyltransferase	SHV-11
25	GCA_023703995.1	Australia	2022-06-13	II	CCWGG	methyltransferase	SHV-1
26	GCA_023658225.1	USA	07-Jun-2022	II/III	CCWGG/CGCATC	restriction enzyme(II)/methyltransferase(II/III)	SHV-11/OXA-9/KPC-3/TEM-1
27	GCA_023658245.1	USA	07-Jun-2022	I/III/III	ACGNNNNNNCTG/CCWGG/CGCATC	specificity subunit(I)/methyltransferase(I/II/III)	SHV-11/SHV-12/KPC-2/TEM-1
28	GCA_023658165.1	USA	07-Jun-2022	II/III	CCWGG/CGCATC	methyltransferase	SHV-11/KPC-2
29	GCA_023657795.1	South Korea	07-Jun-2022	II	CCWGG	restriction enzyme/methyltransferase	SHV-28/OXA-1/CTX-M-15/TEM-1
30	GCA_023657775.1	South Korea	07-Jun-2022	II	CCWGG	restriction enzyme/methyltransferase	SHV-1/OXA-1/CTX-M-15/CTX-M-9/TEM-1
31	GCA_023653925.1	Shanghai	07-Jun-2022	II	CCWGG	methyltransferase	SHV-11/KPC-2/CTX-M-65/TEM-1
32	GCA_023650835.1	Guangdong	07-Jun-2022	I/II	GATGNNNNNCTG/CCWGG	methyltransferase	SHV-11
33	GCA_023612395.1	Switzerland	31-May-2022	II	CCWGG	methyltransferase	SHV-1/OXA-1/OXA-48/DHA-1
34	GCA_023612435.1	Switzerland	31-May-2022	II	CCWGG	methyltransferase	SHV-11/OXA-48
35	GCA_023612215.1	Australia	31-May-2023	I/II	GATGNNNNNCTG/CCWGG	methyltransferase	SHV-28/OXA-1/CTX-M-15/NDM-7/TEM-1
36	GCA_023573825.1	Beijing	29-May-2022	II	CCWGG	methyltransferase	SHV-11/SHV-12/KPC-2/CTX-M-65/TEM-1
37	GCA_023572965.1	Sichuan	29-May-2022	I/II	GATGNNNNNCTG/CCWGG	methyltransferase	SHV-11/KPC-2/CTX-M-65/TEM-1
38	GCA_023573585.1	Beijing	29-May-2022	II	CCWGG	methyltransferase	SHV-11/SHV-12/NDM-1
39	GCA_023573845.1	Beijing	29-May-2022	II	CCWGG	methyltransferase	SHV-11/KPC-2/TEM-1
40	GCA_023573665.1	Beijing	29-May-2022	II	CCWGG	methyltransferase	SHV-11/SHV-12/KPC-2
41	GCA_023538995.1	Spain	24-May-2022	II	CCWGG	methyltransferase	SHV-11/OXA-1/OXA-48/CTX-M-15
42	GCA_023538935.1	Spain	24-May-2022	II	CCWGG	restriction enzyme/methyltransferase	SHV-28/TEM-1/CTX-M-15
43	GCA_023538975.1	Spain	24-May-2022	II	CCWGG	methyltransferase	SHV-11/OXA-1/OXA-48/CTX-M-15
44	GCA_023518315.1	India	23-May-2022	II	CCWGG	restriction enzyme/methyltransferase	SHV-28/OXA-1/CTX-M-15/TEM-1
45	GCA_023518295.1	Sweden	23-May-2022	I/II	CCAYNNNNNTCC/CCWGG	methyltransferase	SHV-1
46	GCA_023518335.1	India	23-May-2022	I/II	GATGNNNNNCTG/CCWGG/CGCATC	restriction enzyme(II)/methyltransferase(I/II)	SHV-187/OXA-1/CTX-M-15/TEM-1
47	GCA_903993065.2	Spain	20-May-2022	I/II	ACGNNNNNNCTG/CCWGG	specificity subunit(I)/restriction enzyme(II)/methyltransferase(I/II)	SHV-1/OXA-1/CTX-M-15/NDM-1
48	GCA_903993165.2	Spain	20-May-2022	I/II	GATGNNNNNCTG/CCWGG	restriction enzyme（I/II）/methyltransferase(I/II)	SHV-11/CTX-M-15/NDM-1
49	GCA_023379965.1	Taiwan	2022-05-17	II	CCWGG	methyltransferase	SHV-1/SHV-12/IMP-27/VIM-1
50	GCA_023374225.1	USA	2022-05-16	I/II	GATGNNNNNCTG/CCWGG	restriction enzyme(II)/methyltransferase(I/II)	SHV-11/OXA-1/OXA-9/CTX-M-15/SHV-28/TEM-1
51	GCA_023374165.1	USA	2022-05-16	I/II	GATGNNNNNCTG/CCWGG	restriction enzyme(II)/methyltransferase(I/II)	SHV-11/OXA-1/OXA-9/CTX-M-15/SHV-28/TEM-1/NDM-1
52	GCA_023373545.1	Zhejiang	2022-05-16	I/II	ACGNNNNNNCTG/GATGNNNNNCTG/CCWGG	methyltransferase(I/II)	SHV-1/NDM-5
53	GCA_023347685.1	Jiangxi	2022-05-12	II	CCWGG	methyltransferase	SHV-28/OXA-1/CTX-M-15/TEM-1/KPC-2
54	GCA_023347665.1	Jiangxi	2022-05-12	I/II	GNAGNNNNRTDCA/CCWGG	methyltransferase(I/II)	SHV-11
55	GCA_023272735.1	Japan	2022-05-07	II	CCWGG	restriction enzyme/methyltransferase	SHV-1/CTX-M-15/TEM-1
56	GCA_023205035.1	Henan	2022-05-02	II	CCWGG	restriction enzyme/methyltransferase	SHV-28/CTX-M-14/DHA-1
57	GCA_924899195.1	France	30-Apr-2022	I/II	ACGNNNNNNCTG/CCWGG	specificity subunit(I)/restriction enzyme(II)/methyltransferase(I/II)	SHV-28/OXA-1/KPC-3/CTX-M-15/TEM-1
58	GCA_023117055.1	Shandong	2022-04-26	II	CCWGG	methyltransferase	SHV-12/OXA-1/KPC-2/CTX-M-65/TEM-1/LAP-2
59	GCA_023184535.1	Italy	2022-04-24	I/II	ACGNNNNNNCTG/CCWGG	specificity subunit(I)/methyltransferase(I/II)	SHV-11/OXA-181/OXA-10/CTX-M-65/TEM-1/CMY-16
60	GCA_023093995.1	Shandong	2022-04-24	II	CCWGG	methyltransferase	SHV-11/NDM-1
61	GCA_023066785.1	Shanghai	2022-04-20	II	CCWGG	methyltransferase	SHV-11/SHV-12/KPC-2/CTX-M-65/TEM-1/CTX-M-3
62	GCA_023025805.1	Beijing	18-Apr-2022	II	CCWGG	restriction enzyme/methyltransferase	SHV-12/NDM-1/SHV-5/IMP-4
63	GCA_022982715.1	Anhui	2022-04-14	II	CCWGG	restriction enzyme/methyltransferase	SHV-11/KPC-2/CTX-M-65/TEM-1
64	GCA_022964795.1	Germany	12-Apr-2022	I/II	GATGNNNNNCTG/CCWGG	restriction enzyme(II)/methyltransferase(I/II)	SHV-11/CTX-M-15/TEM-1
65	GCA_022870805.1	beijing	2022-04-11	II/III	CCWGG/CGCATC	restriction enzyme(II)/methyltransferase(II/III)	SHV-11/OXA-1/CTX-M-15/CMY-6/TEM-1/NDM-1
66	GCA_022869665.1	USA	2022-04-11	I/II	CCAYNNNNNTCC/CCWGG	methyltransferase	SHV-1
67	GCA_022870645.1	Shanghai	2022-04-11	II	CCWGG	methyltransferase	SHV-28/KPC-2
68	GCA_022869145.1	Zhejiang	2022-04-10	II	CCWGG	methyltransferase	SHV-1
69	GCA_022828525.1	Hong Kong	2022-04-06	II	CCWGG	methyltransferase	SHV-11/KPC-2/LAP-2/CTX-M-65/TEM-1/SHV-12
70	GCA_018283575.2	Russia	2022-04-05	I/II	ACGNNNNNNCTG/CCWGG	specificity subunit(I)/methyltransferase(I/II)	SHV-11/KPC-2/CTX-M-15/TEM-1/OXA-1/OXA-10/OXA-48/NDM-1
71	GCA_022809675.1	Shandong	2022-04-03	II	CCWGG	methyltransferase	SHV-11/KPC-2/SHV-12
72	GCA_022809875.1	Hunan	2022-04-03	II	CCWGG	methyltransferase	SHV-11
73	GCA_022759925.1	Switzerland	2022-03-30	II	CCWGG	restriction enzyme/methyltransferase	OXA-10/OXA-48/SHV-1/CTX-M-15/TEM-1/SCO-1/CMY-16
74	GCA_022760005.1	Switzerland	2022-03-30	II	CCWGG	restriction enzyme/methyltransferase	OXA-10/NDM-1/SHV-1/CTX-M-15/TEM-1/SCO-1/CMY-16
75	GCA_022749475.1	Guangxi	29-Mar-2022	II	CCWGG	methyltransferase	SHV-11
76	GCA_022749215.1	Japan	29-Mar-2022	I/II	GATGNNNNNCTG/CCWGG	restriction enzyme(II)/methyltransferase(I/II)	OXA-232/SHV-28/TEM-1/OXA-1/CTX-M-15
77	GCA_022701075.1	India	28-Mar-2022	II/III	CCWGG/CGCATC	methyltransferase	SHV-11
78	GCA_022701055.1	India	28-Mar-2022	I/II /III	CGATNNNNNNNGTTA/CCWGG/CGCATC	restriction enzyme(I/II)/methyltransferase(I/II/III)	SHV-11/OXA-181/CTX-M-15
79	GCA_022699325.1	Japan	2022-03-27	II	CCWGG	restriction enzyme/methyltransferase	OXA-1/SHV-17/NDM-1/CTX-M-15
80	GCA_022592575.1	Jiangsu	2022-03-16	II	CCWGG	methyltransferase	SHV-11/CTX-M-15/TEM-1/DHA-1
81	GCA_022592735.1	Sichuan	2022-03-16	II	CCWGG	methyltransferase	SHV-12/NDM-1/SHV-5/KPC-2/LAP-2
82	GCA_022570755.1	Chongqi	2022-03-15	I/II	ACGNNNNNNCTG/GNAGNNNNRTDCA/CCWGG	methyltransferase	SHV-11/KPC-2/CTX-M-65/TEM-1/OXA-10/LAP-2
83	GCA_022558365.1	Taiwan	2022-03-14	II	CCWGG	methyltransferase	SHV-11/KPC-2/CTX-M-65/CTX-M-55
84	GCA_022559785.1	Zhejiang	2022-03-14	II	CCWGG	restriction enzyme/methyltransferase	SHV-11/CTX-M-15/TEM-1
85	GCA_022539425.1	Zhejiang	10-Mar-2022	II	CCWGG	methyltransferase	OXA-1/SHV-1/NDM-1/CTX-M-14/TEM-1
86	GCA_022533525.1	Zhejiang	9-Mar-2022	II	CCWGG	methyltransferase	SHV-11/KPC-2/CTX-M-65/TEM-1/LAP-2/SHV-12
87	GCA_022493975.1	Hong Kong	2022-03-07	II	CCWGG	methyltransferase	OXA-1/SHV-11/DHA-1
88	GCA_022492875.1	Italy	2022-03-07	I/II/III	ACGNNNNNNCTG/CCWGG/CGCATC	specificity subunit(I)/methyltransferase(I/II)	SHV-11/KPC-3/TEM-1
89	GCA_022494255.1	Hong Kong	2022-03-07	II	CCWGG	methyltransferase	CTX-M-3/TEM-1
90	GCA_022494195.1	Hong Kong	2022-03-07	II	CCWGG	methyltransferase	SHV-28
91	GCA_022494335.1	Hong Kong	2022-03-07	II	CCWGG	restriction enzyme/methyltransferase	SHV-28
92	GCA_022453645.1	Zhejiang	3-Mar-2022	II	CCWGG	restriction enzyme/methyltransferase	SHV-11/KPC-2/CTX-M-5/TEM-1/SHV-12/DHA-1/NDM-1
93	GCA_022453565.1	Zhejiang	3-Mar-2022	I/II	CCAYNNNNNTCC(I)/CCWGG	methyltransferase	SHV-11/CTX-M-3/NDM-5/TEM-1
94	GCA_022369815.1	Italy	2022-02-23	I/II	CGATNNNNNNNGTTA/CCWGG	restriction enzyme/methyltransferase	SHV-11/CTX-M-15/NDM-1
95	GCA_022369925.1	Italy	2022-02-23	I/II	ACGNNNNNNCTG/CGATNNNNNNNGTTA(r)/CCWGG	specificity subunit(I)/restriction enzyme(I)/methyltransferase(I/II)	SHV-11/CTX-M-15/NDM-1/OXA-1
96	GCA_023037315.1	Italy	2022-02-23	I/II	GGCANNNNNNTTC/CCWGG	methyltransferase	SHV-11
97	GCA_022354545.1	Hong Kong	2022-02-22	II	CCWGG	restriction enzyme/methyltransferase	OXA-232/SHV-28/TEM-1/CTX-M-15
98	GCA_022353825.1	Hong Kong	2022-02-22	II	CCWGG	methyltransferase	SHV-11
99	GCA_022354525.1	Zhejiang	2022-02-22	II	CCWGG	restriction enzyme/methyltransferase	OXA-232/SHV-28/TEM-1/CTX-M-15
100	GCA_022353705.1	Hong Kong	2022-02-22	I/II	GGCANNNNNNTTC/CCWGG	methyltransferase	SHV-1/CTX-M-3/TEM-1
101	GCA_022354365.1	Hong Kong	2022-02-23	I/II	GATGNNNNNCTG/CCWGG	methyltransferase	SHV-28/OXA-1/CTX-M-15/TEM-1/CTX-M-55
102	GCA_022354105.1	Hong Kong	2022-02-23	II	CCWGG	methyltransferase	SHV-11/CTX-M-13/TEM-1
103	GCA_022354285.1	Hong Kong	2022-02-23	II	CCWGG	restriction enzyme/methyltransferase	SHV-187/TEM-1
104	GCA_022353805.1	Hong Kong	2022-02-23	II	CCWGG	methyltransferase	SHV-187/TEM-1
105	GCA_022354165.1	Hong Kong	2022-02-22	II	CCWGG	methyltransferase	SHV-27
106	GCA_022354665.1	Hong Kong	2022-02-22	II	CCWGG	methyltransferase	SHV-27/OXA-10
107	GCA_022353525.1	Hong Kong	2022-02-22	I/II	GAANNNNNNRTCG/CCWGG	restriction enzyme(II)/methyltransferase(I/II)	SHV-26/TEM-1/DHA-1/OXA-1
108	GCA_022353665.1	Hong Kong	2022-02-22	II	CCWGG	methyltransferase	SHV-28/TEM-1/CTX-M-3
109	GCA_022354625.1	Hong Kong	2022-02-22	II	CCWGG	methyltransferase	SHV-1/TEM-1/CTX-M-3
110	GCA_022353985.1	Hong Kong	2022-02-22	I/II	CCAYNNNNNTCC/CCWGG	methyltransferase	SHV-11/LAP-2
111	GCA_022213425.1	Shandong	2022-02-13	II	CCWGG	methyltransferase	SHV-11/SHV-12/NDM-1
112	GCA_022213405.2	Zhejiang	2022-02-13	II	CCWGG	methyltransferase	SHV-11/SHV-12/NDM-1/DHA-1
113	GCA_022059905.1	Zhejiang	2022-02-08	II	CCWGG	restriction enzyme/methyltransferase	SHV-11/SHV-12/KPC-2/CTX-M-3/TEM-1/NDM-1/DHA-1
114	GCA_022009655.1	Shandong	2022-02-05	II	CCWGG	methyltransferase	SHV-187
115	GCA_021952765.1	Switzerland	2022-02-04	II	CCWGG	methyltransferase	OXA-48/SHV-1/CTX-M-15
116	GCA_021899755.1	Germany	03-Feb-2022	I/II	GATGNNNNNCTG/CCWGG	restriction enzyme(II)/methyltransferase(I/II)	SHV-28/OXA-1/CTX-M-15/NDM-1/TEM-1/SHV-11
117	GCA_021899575.1	Germany	03-Feb-2022	II	CCWGG	methyltransferase	SHV-11/CTX-M-2/TEM-1/KPC-2
118	GCA_021768325.1	Spain	01-Feb-2022	II	CCWGG	methyltransferase	SHV-11/CTX-M-15/TEM-1/OXA-1/OXA-48
119	GCA_021729925.1	Guangdong	2022-01-31	II	CCWGG	restriction enzyme/methyltransferase	SHV-1/CTX-M-15/OXA-1
120	GCA_021729765.1	Guangzhou	2022-01-31	I/II	GGANNNNNNCTTT/CCWGG	methyltransferase	SHV-1/CTX-M-15/TEM-1
121	GCA_021729905.1	Guangdong	2022-01-31	I/II	CGATNNNNNNNGTTA/CCWGG	restriction enzyme(I)/methyltransferase(I/II)	SHV-11
122	GCA_021560095.1	Sichuan	2022-01-24	II	CCWGG	methyltransferase	SHV-11/CTX-M-65/TEM-1/KPC-2/LAP-2
123	GCA_021535105.1	Beijing	2022-01-20	II	CCWGG	methyltransferase	SHV-11/TEM-1
124	GCA_021535085.1	Beijing	2022-01-20	II	CCWGG	methyltransferase	SHV-11/CTX-M-15/TEM-1
125	GCA_021497485.1	Zhejiang	2022-01-18	II	CCWGG	methyltransferase	SHV-11/CTX-M-65/TEM-1/KPC-71/LAP-2/SHV-12
126	GCA_021498005.1	Guangdong	2022-01-18	II	CCWGG	methyltransferase	SHV-11
127	GCA_021497265.1	Anhui	2022-01-18	II	CCWGG	methyltransferase	SHV-11
128	GCA_021496095.1	Brazil	2022-01-18	II	CCWGG	restriction enzyme/methyltransferase	SHV-11/OXA-9/CTX-M-15/KPC-2
129	GCA_021496545.1	Guangdong	2022-01-18	II	CCWGG	methyltransferase	SHV-11
130	GCA_021484985.1	Italy	2022-01-16	I/II/III	ACGNNNNNNCTG/CCWGG/CGCATC	specificity subunit(I)/methyltransferase(I/II/III)	SHV-11/KPC-3/TEM-1
131	GCA_021484965.1	Zhengzhou	2022-01-16	I/II/III	GATGNNNNNCTG/CCWGG/CGCATC	methyltransferase	SHV-1/OXA-1/CTX-M-55/DHA-1
132	GCA_021464465.1	Taiwan	2022-01-14	II	CCWGG	methyltransferase	SHV-11/KPC-2/CTX-M-65
133	GCA_021460155.1	United Kingdom	2022-01-13	II	CCWGG	methyltransferase	SHV-1
134	GCA_021442065.1	Shanghai	2022-01-12	II	CCWGG	methyltransferase	KPC-2/CTX-M-65
135	GCA_021441845.1	Zhejiang	2022-01-12	I/II	GNAGNNNNRTDCA/CCWGG	methyltransferase	SHV-12/NDM-1
136	GCA_021442005.1	Guangdong	2022-01-12	II	CCWGG	methyltransferase	SHV-11/SHV-12/KPC-2/CTX-M-65/LAP-2
137	GCA_021431985.1	Zhejiang	2022-01-11	II	CCWGG	methyltransferase	SHV-11
138	GCA_021432125.1	Jingsu	2022-01-11	II	CCWGG	restriction enzyme/methyltransferase	SHV-11/KPC-2/CTX-M-15/TEM-1/OXA-1
139	GCA_021432005.1	Zhejiang	2022-01-11	I/II	ACGNNNNNNCTG/CCWGG	specificity subunit(I)/methyltransferase(I/II)	SHV-28/CTX-M-27
140	GCA_021398155.1	Shandong	2022-01-10	II	CCWGG	methyltransferase	SHV-11/CTX-M-65/NDM-1/KPC-2/TEM-1/SHV-12/CMY-6
141	GCA_021397755.1	Beijing	2022-01-10	II	CCWGG	methyltransferase	SHV-11
142	GCA_021398445.1	Beijing	2022-01-10	II	CCWGG	methyltransferase	SHV-11
143	GCA_021397585.1	Zhejiang	2022-01-10	II	CCWGG	methyltransferase	SHV-28/KPC-2/DNM-1/SHV-12
144	GCA_021389995.1	Sichuan	08-Jan-2022	II	CCWGG	methyltransferase	SHV-1/CTX-M-14/NDM-1/DHA-1
145	GCA_021655415.1	Japan	2021-12-24	II	CCWGG	methyltransferase	SHV-11
146	GCA_021249265.1	Beijing	2021-12-21	II	CCWGG	methyltransferase	SHV-11/CTX-M-71/TEM-1
147	GCA_021228815.1	Australia	2021-12-19	II	CCWGG	restriction enzyme/methyltransferase	SHV-11/CTX-M-15/TEM-1/OXA-1
148	GCA_021655515.1	Japan	2021-12-18	II	CCWGG	methyltransferase	SHV-1/CTX-M-14/LAP-2
149	GCA_021172125.1	Hong Kong	2021-12-13	II	CCWGG	restriction enzyme/methyltransferase	SHV-32/CTX-M-14/TEM-1/DHA-1
150	GCA_021166215.1	USA	2021-12-12	II	CCWGG	methyltransferase	SHV-11/DHA-1
151	GCA_021166055.1	USA	2021-12-12	II	CCWGG	methyltransferase	SHV-11/DHA-1
152	GCA_021166115.1	USA	2021-12-12	II	CCWGG	methyltransferase	SHV-11/CTX-M-15/TEM-1/OXA-1/OXA-48
153	GCA_021166235.1	USA	2021-12-12	II	CCWGG	restriction enzyme/methyltransferase	SHV-11/CTX-M-15/TEM-1/OXA-1/OXA-48
154	GCA_021166195.1	USA	2021-12-12	II	CCWGG	methyltransferase	SHV-11/CTX-M-14/TEM-1/DHA-1/OXA-48
155	GCA_021166135.1	USA	2021-12-12	I/II	CGATNNNNNNNGTTA/ACGNNNNNNCTG/CCWGG	restriction enzyme(I)/methyltransferase(I/II)	SHV-11/CTX-M-55/TEM-1/OXA-1/OXA-48
156	GCA_021138155.1	Switzerland	2021-12-09	I/II	CGATNNNNNNNGTTA/ACGNNNNNNCTG/CCWGG	restriction enzyme(I)/methyltransferase(I/II)	SHV-11/CTX-M-14/TEM-1/DHA-1/OXA-48/OXA-1/CTX-M-15
157	GCA_021137635.1	Switzerland	2021-12-09	II	CCWGG/GATC	restriction enzyme/methyltransferase	SHV-1/OXA-9/TEM-1/OXA-48/CTX-M-14
158	GCA_021135615.1	Switzerland	2021-12-09	II	CCWGG	restriction enzyme/methyltransferase	SHV-1/CTX-M-15/OXA-9/OXA-1/OXA-48
159	GCA_021137895.1	Switzerland	2021-12-09	I/II	ACGNNNNNNCTG/CCWGG	methyltransferase	SHV-28/OXA-1/CTX-M-15/OXA-232
160	GCA_021137795.1	Switzerland	2021-12-09	II	CCWGG	restriction enzyme/methyltransferase	SHV-1/CTX-M-15/OXA-48
161	GCA_021137775.1	Switzerland	2021-12-09	II	CCWGG	restriction enzyme/methyltransferase	SHV-1/CTX-M-15/OXA-1
162	GCA_021138035.1	Switzerland	2021-12-09	I/II	CGATNNNNNNNGTTA/CCWGG	restriction enzyme(I/II)/methyltransferase(I/II)	SHV-11/CTX-M-15/OXA-1/OXA-48
163	GCA_021137615.1	Switzerland	2021-12-09	II	CCWGG	methyltransferase	SHV-1/CTX-M-15/OXA-1/NDM-1
164	GCA_001718115.2	Brazil	2021-12-08	II	CCWGG	restriction enzyme/methyltransferase	SHV-11/CTX-M-15/OXA-9/KPC-2
165	GCA_021057265.1	Italy	2021-12-06	I/II	CGATNNNNNNNGTTA/CCWGG	restriction enzyme(I)/methyltransferase(I/II)	SHV-11/CTX-M-15/TEM-1/OXA-9
166	GCA_020991145.1	Jiangsu	2021-11-28	II	CCWGG	restriction enzyme/methyltransferase	SHV-11/CTX-M-15/TEM-1/OXA-1/KPC-2
167	GCA_020990405.1	Beijing	2021-11-27	I/II	CAAANNNNNNRTCA /CCWGG/GATC	restriction enzyme(I)/methyltransferase(II)	SHV-11/DHA-1/NDM-1
168	GCA_920103885.1	France	2021-11-25	I/II	CGATNNNNNNNGTTA/CCWGG	restriction enzyme(I/II)/methyltransferase(I/II)	SHV-11/OXA-181/CTX-M-15/NDM-5/TEM-1
169	GCA_020911805.1	Beijing	2021-11-22	II	CCWGG	methyltransferase	SHV-11
170	GCA_020906545.1	Denmark	2021-11-21	I/II	GATGNNNNNCTG/CCWGG	restriction enzyme(II)/methyltransferase(I/II)	SHV-187/CTX-M-15/OXA-1/TEM-1
171	GCA_018274525.2	Russia	2021-11-10	I/II	ACGNNNNNNCTG/CCWGG	specificity subunit(I)/methyltransferase(I/II)	SHV-1/CTX-M-15/OXA-10/OXA-1/OXA-48/KPC-2/NDM-1/TEM-1
172	GCA_020808985.1	Shanghai	2021-11-09	II	CCWGG	methyltransferase	SHV-11
173	GCA_020736285.1	Zhejiang	2021-11-08	II	CCWGG	methyltransferase	SHV-11/CTX-M-65/LAP-2/KPC-33
174	GCA_020641015.1	Shanghai	27-Oct-2021	II	CCWGG	methyltransferase	SHV-11
175	GCA_020535145.1	Zhengzhou	2021-10-20	I/II	ACGNNNNNNCTG/CCWGG	methyltransferase	SHV-11/NDM-1/KPC-2/TEM-1
176	GCA_020525645.1	Australia	19-Oct-2021	II	CCWGG	methyltransferase	SHV-11
177	GCA_020525505.1	Australia	19-Oct-2021	II	CCWGG	methyltransferase	SHV-11
178	GCA_020525865.1	Australia	19-Oct-2021	I/II	GNAGNNNNRTDCA/CCWGG	methyltransferase	SHV-1
179	GCA_020526025.1	Australia	19-Oct-2021	II	CCWGG	methyltransferase	SHV-28/TEM-1
180	GCA_020526005.1	Australia	19-Oct-2021	II/III	CCWGG/CGCATC	methyltransferase	SHV-28/SHV-12/TEM-1
181	GCA_020525885.1	Australia	19-Oct-2021	II	CCWGG	methyltransferase	SHV-1
182	GCA_020526065.1	Australia	19-Oct-2021	II	CCWGG	methyltransferase	SHV-207
183	GCA_020526045.1	Australia	19-Oct-2021	I/II	GNAGNNNNRTDCA/CCWGG	methyltransferase	SHV-11
184	GCA_020520185.1	Zhejiang	18-Oct-2021	II	CCWGG	methyltransferase	SHV-11/KPC-2/LAP-1/TEM-1/SHV-12
185	GCA_020459305.1	Jiangsu	13-Oct-2021	II	CCWGG	methyltransferase	SHV-11/SHV-12/NDM-1
186	GCA_020405285.1	Shanghai	10-Oct-2021	II	CCWGG	methyltransferase	SHV-11/SHV-12/KPC-2/CTX-M-15/TEM-1
187	GCA_020221715.1	India	2021-10-04	II	CCWGG	restriction enzyme/methyltransferase	SHV-33/OXA-1/CTX-M-15/TEM-1
188	GCA_018283505.2	India	2021-10-04	I/II	CGATNNNNNNNGTTA/CCWGG	restriction enzyme(I)/methyltransferase(I/II)	SHV-11/CTX-M-15/NDM-1
189	GCA_020215625.1	India	2021-10-02	I/II	ACGNNNNNNCTG/CCWGG	specificity subunit(I)/methyltransferase(I/II)	SHV-11/CTX-M-15/OXA-232
190	GCA_020172745.1	Shanxi	29-Sep-2021	I/II	CAAANNNNNNRTCA /CCWGG	restriction enzyme(I)/methyltransferase(I/II)	SHV-11/OXA-10
191	GCA_020149875.1	Australia	27-Sep-2021	I/II	GATGNNNNNCTG/CCWGG	methyltransferase	SHV-11
192	GCA_020149895.1	Australia	27-Sep-2021	I	GATGNNNNNCTG	methyltransferase	SHV-1
193	GCA_020080125.1	Sichuan	21-Sep-2021	II	CCWGG	methyltransferase	SHV-11/SHV-28/DHA-1
194	GCA_020023465.1	Shanxi	2021-09-17	I/II	GAANNNNNNNRTCG/GAANNNNNNRTCG/CCWGG	specificity subunit(I)/restriction enzyme(I)/methyltransferase(I/II)	SHV-11/OXA-10
195	GCA_019915305.1	Kazakhstan	2021-09-09	II	CCWGG	methyltransferase	SHV-11
196	GCA_019900785.1	USA	2021-09-08	I/II	CAAANNNNNNRTCA/CCWGG	methyltransferase	SHV-33
197	GCA_019900305.1	USA	2021-09-08	II	CCWGG	methyltransferase	SHV-11
198	GCA_019900345.1	USA	2021-09-08	II	CCWGG	methyltransferase	SHV-33
199	GCA_019900325.1	USA	2021-09-08	II	CCWGG	methyltransferase	SHV-168
200	GCA_019880265.1	Hubei	2021-09-05	II	CCWGG	methyltransferase	SHV-1/SHV-12/TEM-1/CTX-M-3/SFO-1
201	GCA_007955105.2	Zhejiang	2021-09-02	II	CCWGG	methyltransferase	SHV-11/SHV-12/KPC-2/CTX-M-65/LAP-2/TEM-1
202	GCA_018138305.2	Zhejiang	2021-09-03	II	CCWGG	methyltransferase	SHV-1/CTX-M-55
203	GCA_019823765.1	Zhengzhou	2021-08-31	II/IIG	CCWGG/GTTCNAC	restriction enzyme(II/IIG)/methyltransferase(II/IIG)	SHV-11/CTX-M-65/TEM-1/KPC-2/OXA-1/CTX-M-15
204	GCA_019798185.1	Norway	2021-08-30	NO			SHV-11/SHV-12
205	GCA_019793595.1	Beijing	2021-08-29	II	CCWGG	methyltransferase	SHV-11/CTX-M-65/TEM-1/KPC-2/TEM-1
206	GCA_019974175.1	Japan	2021-08-27	II	CCWGG	methyltransferase	SHV-11
207	GCA_019454345.1	Zhejiang	2021-08-05	II	CCWGG	methyltransferase	SHV-11/KPC-2
208	GCA_019455345.1	USA	2021-08-05	I/II	GNAGNNNNRTDCA/CCWGG	methyltransferase	SHV-11
209	GCA_019444195.1	Hubei	2021-08-03	II	CCWGG	restriction enzyme/methyltransferase	SHV-12/KPC-2/TEM-1/LAP-1/NDM-1
210	GCA_019444635.1	Hong Kong	2021-08-03	II	CCWGG	restriction enzyme/methyltransferase	SHV-11/SHV-12/KPC-2/CTX-M-65/TEM-1/DHA-1
211	GCA_019443545.1	Sichuan	2021-08-03	I/II	CCAYNNNNNTCC(I)/CCWGG	restriction enzyme(II)/methyltransferase(I/II)	SHV-1/CTX-M-15/OXA-1/OXA-48/TEM-1
212	GCA_019434255.1	Zhejiang	2021-08-02	II	CCWGG	methyltransferase	SHV-11/SHV-12/KPC-2/TEM-1
213	GCA_911728565.1	Netherlands	2021-07-30	I/II	ACGNNNNNNCTG/CGATNNNNNNNGTTA(r)/CCWGG	restriction enzyme(I)/methyltransferase(I/II)	SHV-11
214	GCA_019334545.1	Zhejiang	2021-07-25	II	CCWGG	restriction enzyme/methyltransferase	SHV-28/TEM-1/CTX-M-15/OXA-232
215	GCA_019334625.1	Jilin	2021-07-25	II	CCWGG	restriction enzyme/methyltransferase	SHV-28/CTX-M-27/TEM-1
216	GCA_019334705.1	India	2021-07-25	II	CCWGG	methyltransferase	SHV-1/CTX-M-15/OXA-1/TEM-1
217	GCA_019317085.1	India	2021-07-22	I/II	GATGNNNNNCTG/CCWGG	restriction enzyme(II)/methyltransferase(I/II)	SHV-28/OXA-1/OXA-10/OXA-9/TEM-1/CTX-M-15
218	GCA_019286375.1	India	2021-07-20	II	CCWGG	methyltransferase	SHV-1/OXA-1/CTX-M-15/OXA-181/CMY-4
219	GCA_019134695.1	Chongqing	2021-07-06	II	CCWGG	methyltransferase	SHV-11
220	GCA_910589455.1	France	2021-07-06	I/II	GATGNNNNNCTG/CCWGG	restriction enzyme(II)/methyltransferase(I/II)	SHV-11/SHV-12/REM-1/SCO-1
221	GCA_019107705.1	USA	2021-07-05	II	CCWGG	methyltransferase	SHV-11/CTX-M-65/LAP-2/KPC-2
222	GCA_019107685.1	USA	2021-07-05	II	CCWGG	methyltransferase	SHV-110/CTX-M-15/OXA-1/OXA-48/NDM-1
223	GCA_003937135.2	USA	2021-07-02	I/II	GATGNNNNNCTG/CCWGG	restriction enzyme(II)/methyltransferase(I/II)	SHV-28/CTX-M-15/OXA-1/OXA-9/NDM-1/TEM-1
224	GCA_019703025.1	Japan	2021-07-02	II/III	CCWGG/CGCATC	restriction enzyme(II)/methyltransferase(II/III)	SHV-11/KPC-2
225	GCA_019038575.1	Brazil	2021-06-26	II	CCWGG	methyltransferase	SHV-121/KPC-2/CTX-M-15
226	GCA_018885345.1	Zhejiang	2021-06-15	I/II	GATGNNNNNCTG/CCWGG	methyltransferase	SHV-11/KPC-2
227	GCA_007421875.2	USA	2021-06-15	II	CCWGG	methyltransferase	SHV-26/NDM-1
228	GCA_018831545.1	Zhejiang	2021-06-10	II	CCWGG	methyltransferase	SHV-11/SHV-12/KPC-2/CTX-M-65/TEM-1
229	GCA_018623335.1	India	2021-06-02	I/II	CGATNNNNNNNGTTA/CCWGG	restriction enzyme(I/II)/methyltransferase(I/II)	SHV-11/CTX-M-15/OXA-1/OXA-48/VEB-8/CMY-2/TEM-1
230	GCA_018604345.1	Spain	2021-06-01	II	CCWGG	restriction enzyme/methyltransferase	SHV-11/CTX-M-15/TEM-1
231	GCA_018604385.1	India	2021-06-01	II	CCWGG	restriction enzyme/methyltransferase	SHV-11/NDM-1/OXA-1
232	GCA_018604765.1	Norway	2021-06-01	I/II	ACGNNNNNNCTG/CCWGG	methyltransferase	SHV-11/CTX-M-63/TEM-1
233	GCA_018502565.1	Jiangsu	2021-05-26	II	CCWGG	methyltransferase	SHV-11/LAP-2/DHA-1/TEM-1
234	GCA_018454365.1	Jiangsu	2021-05-24	II	CCWGG	methyltransferase	SHV-28/KPC-2/DHA-1
235	GCA_018449065.1	Jiangsu	2021-05-23	NO			SHV-11/DHA-1
236	GCA_018449045.1	Jiangsu	2021-05-23	I/II	CGATNNNNNNNGTTA/CCWGG	restriction enzyme(I)/methyltransferase(I/II)	SHV-11/CTX-M-3/TEM-1/DHA-1
237	GCA_018394355.1	India	18-May-2021	II	CCWGG	restriction enzyme/methyltransferase	SHV-33/CTX-M-15/TEM-1
238	GCA_018336835.1	Zhejiang	2021-05-11	II	CCWGG	methyltransferase	SHV-11/SHV-12/KPC-74/CTX-M-65/LAP-2/TEM-1
239	GCA_018314115.1	Hong Kong	2021-05-10	I/II	CGATNNNNNNNGTTA/CCWGG	restriction enzyme(I)/methyltransferase(I/II)	SHV-11/CTX-M-15/DHA-1/CTX-M-104
240	GCA_018314145.1	Hunan	2021-05-10	II/IIG	GTTCNAC/CCWGG	restriction enzyme(II/IIG)/methyltransferase(IIG/II)	SHV-11/KPC-2/NDM-5
241	GCA_018310495.1	Italy	2021-05-09	I/II	CGATNNNNNNNGTTA/ACGNNNNNNCTG/CCWGG	specificity subunit(I)/methyltransferase(I/II)/restriction enzyme(I)	SHV-11/CTX-M-15/NDM-1/OXA-1
242	GCA_018279325.1	USA	2021-05-05	I/II	GATGNNNNNCTG/CCWGG	restriction enzyme(I/II)/methyltransferase(II)	SHV-11/SHV-12/KPC-2/CTX-M-65/TEM-1/OXA-48
243	GCA_018278725.1	Iraq	2021-05-05	I/II	CGATNNNNNNNGTTA/GNAGNNNNRTDCA/CCWGG	restriction enzyme(I/II)/methyltransferase(I/II)	OXA-9/TEM-1
244	GCA_018279185.1	Beijing	2021-05-05	II	CCWGG	methyltransferase	SHV-11/CTX-M-14
245	GCA_018140905.1	Sichuan	2021-04-27	II	CCWGG	methyltransferase	SHV-11/CTX-M-15/KPC-2/TEM-1
246	GCA_018128465.1	Switzerland	2021-04-22	II	CCWGG	methyltransferase	SHV-11/NDM-1/TEM-1/OXA-10/OXA-1/CTX-M-15/CMY-4
247	GCA_002853115.2	Sichuan	2021-04-20	II	CCWGG	methyltransferase	SHV-11
248	GCA_018075325.1	Zhejiang	2021-04-19	II	CCWGG	methyltransferase	SHV-11/CTX-M-65/KPC-2/TEM-1
249	GCA_018075085.1	USA	2021-04-19	II	CCWGG	methyltransferase	SHV-27/KPC-3/OXA-9/TEM-1
250	GCA_018069685.1	Zhejiang	2021-04-18	I/II	GCCNNNNNCATC/CCWGG	methyltransferase	SHV-1/SHV-12/DHA-1
251	GCA_001185665.3	USA	2021-04-14	II	CCWGG	methyltransferase	SHV-11/KPC-3/TEM-1/OXA-9
252	GCA_017916195.1	Iraq	2021-04-13	I/II	CGATNNNNNNNGTTA(r)/GNAGNNNNRTDCA（m）/CCWGG	restriction enzyme(I/II)/methyltransferase(I/II)	OXA-9/OXA-48/TEM-1
253	GCA_017894285.1	Poland	2021-04-09	II	CCWGG	methyltransferase	SHV-11/TEM-1
254	GCA_017894305.1	Poland	2021-04-09	II	CCWGG	methyltransferase	SHV-11/CTX-M-3/TEM-1
255	GCA_014490685.2	Argentina	2021-04-09	I/II	CGATNNNNNNNGTTA(r)/GNAGNNNNRTDCA（m）/CCWGG	restriction enzyme(I)/methyltransferase(I/II)	SHV-11/CTX-M-15/OXA-1/NDM-1/TEM-24
256	GCA_017815795.1	Guangdong	2021-04-07	II	CCWGG	methyltransferase	SHV-1/CTX-M-14/LAP-2/TEM-1
257	GCA_017815715.1	Guangdong	2021-04-07	I/II	CCANNNNNNNNTGAG/CCWGG	specificity subunit(I)/methyltransferase(II)	SHV-75
258	GCA_017809835.1	Tianjin	2021-04-06	II	CCWGG	methyltransferase	CTX-M-15/KPC-2/DHA-1
259	GCA_017743095.1	Guangdong	2021-04-04	II	CCWGG	methyltransferase	SHV-11
260	GCA_017742955.1	India	2021-04-04	I/II	ACGNNNNNNCTG/CCWGG	specificity subunit(I)/methyltransferase(I/II)	SHV-1/CTX-M-15/OXA-232/TEM-1
261	GCA_017743135.1	Guangdong	2021-04-04	I/II	ACGNNNNNNCTG/CCWGG	methyltransferase	SHV-1
262	GCA_017742895.1	India	2021-04-04	II	CCWGG	restriction enzyme/methyltransferase	SHV-33/CTX-M-15/TEM-1/OXA-1
263	GCA_017639065.1	Switzerland	2021-03-30	II	CCWGG	restriction enzyme/methyltransferase	SHV-28/CTX-M-15/TEM-1
264	GCA_017357925.1	Hunan	16-Mar-2021	II	CCWGG	restriction enzyme/methyltransferase	SHV-11/DHA-1
265	GCA_017351975.1	Beijing	14-Mar-2021	II	CCWGG	methyltransferase	SHV-11
266	GCA_017315205.1	Shanghai	2021-03-10	I/II	GNAGNNNNRTDCA/CCWGG	methyltransferase	SHV-11
267	GCA_017310405.1	Beijing	2021-03-09	I/II	GNAGNNNNRTDCA/CCWGG	restriction enzyme(II)/methyltransferase(I/II)	SHV-27/CTX-M-3/CTX-M-65/TEM-1/CTX-M-14
268	GCA_017310365.1	Beijing	2021-03-09	II	CCWGG	methyltransferase	SHV-11/SHV-2/CTX-M-15/OXA-1/TEM-1
269	GCA_017310305.1	Beijing	2021-03-09	II	CCWGG	restriction enzyme/methyltransferase	SHV-1/CTX-M-14/OXA-48
270	GCA_017310385.1	Beijing	2021-03-09	II	CCWGG	restriction enzyme/methyltransferase	SHV-11/OXA-1/TEM-1
271	GCA_017310425.1	Beijing	2021-03-09	I/II	CGATNNNNNNNGTTA/CCWGG	restriction enzyme(I/II)/methyltransferase(I/II)	SHV-11/CTX-M-55/CTX-M-14/OXA-48
272	GCA_017301375.1	Saudi Arabia	2021-03-08	I/II	GATGNNNNNCTG/CCWGG	methyltransferase	SHV-28/CTX-M-14/OXA-1/OXA-48/NDM-1
273	GCA_017277455.1	Iraq	2021-03-07	I/II	CGATNNNNNNNGTTA(r)/GNAGNNNNRTDCA（m）/CCWGG	restriction enzyme(I/II)/methyltransferase(I/II)	SHV-11/OXA-9/TEM-1
274	GCA_017086485.1	Shanghai	2021-03-01	II	CCWGG	methyltransferase	SHV-11/CTX-M-14/TEM-1
275	GCA_017084505.1	Shandong	2021-03-01	II	CCWGG	restriction enzyme/methyltransferase	SHV-1/CTX-M-15/NDM-1/TEM-1
276	GCA_016939695.1	Czech Republic	2021-02-25	II	CCWGG	methyltransferase	SHV-1/KPC-2/TEM-1
277	GCA_016939815.1	Czech Republic	2021-02-25	II	CCWGG	methyltransferase	SHV-11/OXA-1/KPC-2/DHA-1
278	GCA_016925415.1	India	2021-02-24	I/II	ACGNNNNNNCTG/CCWGG	specificity subunit(I)/methyltransferase(I/II)	SHV-1/CTX-M-15/OXA-232/TEM-1
279	GCA_016904275.1	USA	2021-02-17	II/III	CCWGG/CGCATC	methyltransferase	SHV-11
280	GCA_016903515.1	USA	2021-02-17	II	CCWGG	methyltransferase	SHV-1/TEM-1
281	GCA_016903875.1	USA	2021-02-17	II	CCWGG	methyltransferase	SHV-1
282	GCA_016903235.1	USA	2021-02-17	II	CCWGG	restriction enzyme/methyltransferase	SHV-32
283	GCA_016903295.1	USA	2021-02-17	II	CCWGG	restriction enzyme/methyltransferase	SHV-28/CTX-M-15/OXA-1/TEM-1
284	GCA_016903115.1	USA	2021-02-17	II	CCWGG	methyltransferase	SHV-11/CTX-M-27/TEM-1
285	GCA_016903755.1	USA	2021-02-17	II	CCWGG	methyltransferase	SHV-11
286	GCA_016904635.1	USA	2021-02-17	II	CCWGG	methyltransferase	SHV-1
287	GCA_016904315.1	USA	2021-02-17	II/III	CCWGG/CGCATC	restriction enzyme(II)/methyltransferase(II/III)	SHV-1
288	GCA_016864395.1	Taiwan	2021-02-11	I/II	ACGNNNNNNCTG/CCWGG	specificity subunit(I)/restriction enzyme(I)/methyltransferase(I/II)	SHV-28/TEM-1
289	GCA_016812055.1	Sichuan	07-Feb-2021	II	CCWGG	methyltransferase	SHV-11/KPC-2/CTX-M-65/TEM-1/NDM-5/SHV-12
290	GCA_016804025.1	Yunnan	2021-02-03	II	CCWGG	methyltransferase	SHV-11/KPC-2/CTX-M-65/TEM-1/LAP-2
291	GCA_016801375.1	Colombia	2021-02-02	II/III	CCWGG/CGCATC	methyltransferase	SHV-11/KPC-3/TEM-1/SHV-12
292	GCA_016800965.1	Hunan	2021-02-02	I/II	GATGNNNNNCTG/CCWGG	methyltransferase	SHV-1/OXA-10/LAP-1
293	GCA_016780145.1	Netherlands	2021-02-01	II	CCWGG	methyltransferase	SHV-110/OXA-48
294	GCA_016780025.1	Netherlands	2021-02-01	II/III	CCWGG/CGCATC	methyltransferase	SHV-1/OXA-48
295	GCA_016774455.1	Shanghai	2021-01-31	II	CCWGG	methyltransferase	SHV-11/KPC-2/TEM-1
296	GCA_016772575.1	USA	2021-01-30	II/III	CCWGG/CGCATC	methyltransferase	SHV-11/KPC-2/TEM-1
297	GCA_016772535.1	USA	2021-01-30	II/III	CCWGG/CGCATC	methyltransferase	SHV-12/KPC-2/TEM-1
298	GCA_016727425.1	USA	2021-01-20	II/III	CCWGG/CGCATC	methyltransferase	SHV-11
299	GCA_016694775.1	Henan	2021-01-19	II	CCWGG	methyltransferase	SHV-27
300	GCA_015159775.2	India	2021-01-05	I/II	ACGNNNNNNCTG(R/M)/GATGNNNNNCTG(M)/CCWGG	specificity subunit(I)/methyltransferase(I/II)	SHV-11/CTX-M-15/TEM-1/OXA-181
301	GCA_016403065.1	Zhejiang	2020-12-26	II	CCWGG	methyltransferase	SHV-11/KPC-2/CTX-M-65/TEM-1/LAP-2/SHV-12
302	GCA_014041505.2	Sichuan	2020-12-22	II	CCWGG	restriction enzyme/methyltransferase	SHV-11/CTX-M-15/OXA-1/KPC-2/CTX-M-65/TEM-1
303	GCA_015022235.2	Taiwan	2020-12-22	II	CCWGG	methyltransferase	SHV-11/CTX-M-14/TEM-2/KPC-2/OXA-10/CTX-M-65/CMY-174/DHA-1
304	GCA_016066295.1	USA	2020-12-15	II	CCWGG	methyltransferase	SHV-27
305	GCA_016067835.1	USA	2020-12-15	II	CCWGG	methyltransferase	SHV-11/CTX-M-14/TEM-1/TEM-31/OXA-48
306	GCA_016066025.1	USA	2020-12-15	I/II	CCAYNNNNNTCC(I)/CCWGG	methyltransferase	SHV-1
307	GCA_015999625.1	Zhejiang	2020-12-13	II	CCWGG	methyltransferase	SHV-11
308	GCA_015992305.1	USA	2020-12-12	II	CCWGG	restriction enzyme/methyltransferase	SHV-11/CTX-M-14/TEM-1/KPC-2/OXA-1/CTX-M-65
309	GCA_015992425.1	USA	2020-12-12	II	CCWGG	methyltransferase	SHV-11/CTX-M-14/TEM-1/DHA-1/OXA-48
310	GCA_015992325.1	USA	2020-12-12	II	CCWGG	methyltransferase	SHV-11/CTX-M-14/TEM-1/KPC-2/CTX-M-65
311	GCA_015992265.1	USA	2020-12-12	II	CCWGG	methyltransferase	SHV-11/CTX-M-14/TEM-1/KPC-2
312	GCA_015992385.1	USA	2020-12-12	II	CCWGG	methyltransferase	SHV-11/CTX-M-14/TEM-1/KPC-2/CTX-M-90/TEM-31
313	GCA_015992345.1	USA	2020-12-12	I/II	GGANNNNNNCTTT/CCWGG	methyltransferase	SHV-26/DHA-1/TEM-1
314	GCA_015992285.1	USA	2020-12-12	I/II	CCAYNNNNNTCC(I)/CCWGG	restriction enzyme(II)/methyltransferase(I/II)	SHV-11/TEM-1
315	GCA_015910145.1	Canada	2020-12-10	II	CCWGG	methyltransferase	SHV-1/CMY-2/TEM-1/CTX-M-14
316	GCA_015832035.1	Beijing	2020-12-08	I/II	GGANNNNNNCTTT/CCWGG	methyltransferase	SHV-1
317	GCA_015774955.1	Shanxi	2020-12-07	II	CCWGG	restriction enzyme/methyltransferase	SHV-11/NDM-5
318	GCA_015774895.1	Shanxi	2020-12-07	I/II	GGANNNNNNCTTT/CCWGG	methyltransferase	SHV-27/NDM-1
319	GCA_016629585.1	Japan	2020-12-04	I/II	GATGNNNNNCTG/CCWGG	methyltransferase	SHV-11
320	GCA_015694085.1	Australia	2020-11-29	II	CCWGG	restriction enzyme/methyltransferase	SHV-187/CTX-M-15/OXA-1/TEM-1
321	GCA_015644745.1	India	2020-11-22	II	CCWGG	methyltransferase	SHV-11/KPC-2/CTX-M-14/TEM-1
322	GCA_015024285.2	Norway	2020-11-19	II/III	CCWGG/CGCATC	methyltransferase	CTX-M-3/TEM-1
323	GCA_015475915.1	Colombia	2020-11-15	II	CCWGG	restriction enzyme/methyltransferase	SHV-1/CTX-M-14/OXA-1/KPC-2
324	GCA_015356055.1	Jiangxi	2020-11-12	II	CCWGG	methyltransferase	SHV-11/CTX-M-14/TEM-1/KPC-2/CTX-M-65
325	GCA_015355835.1	Jiangxi	2020-11-12	II	CCWGG	methyltransferase	SHV-11
326	GCA_015353095.1	Henan	2020-11-11	II	CCWGG	restriction enzyme/methyltransferase	SHV-11/CTX-M-27/NDM-5
327	GCA_015338385.1	Guangdong	2020-11-10	II	CCWGG	methyltransferase	SHV-1/LAP-2
328	GCA_015284665.1	Guangdong	2020-11-09	II	CCWGG	methyltransferase	SHV-11
329	GCA_015290985.1	Shandong	2020-11-09	II	CCWGG	methyltransferase	SHV-11/CTX-M-14/LAP-2/OXA-1/NDM-1
330	GCA_015286445.1	Guangdong	2020-11-09	II	CCWGG	methyltransferase	SHV-11
331	GCA_015283665.1	Guangdong	2020-11-09	II	CCWGG	methyltransferase	SHV-1
332	GCA_015288605.1	Guangdong	2020-11-09	II	CCWGG	methyltransferase	SHV-33/CTX-M-3/TEM-1
333	GCA_015289985.1	Guangdong	2020-11-09	I/II	CCANNNNNNNNTGAG(S)/GATGNNNNNCTG(M)/CCWGG	specificity subunit(I)/restriction enzyme(II)/methyltransferase(I/II)	SHV-75
334	GCA_015283885.1	Guangdong	2020-11-09	II	CCWGG	methyltransferase	SHV-11
335	GCA_015289145.1	Guangdong	2020-11-09	II	CCWGG	methyltransferase	SHV-1
336	GCA_015290925.1	Guangdong	2020-11-09	I/II/III	GATGNNNNNCTG/CCWGG/CGCATC	methyltransferase	SHV-11/CTX-M-15/TEM-1/DHA-1/OXA-1/LAP-2
337	GCA_015289765.1	Guangdong	2020-11-09	II	CCWGG	methyltransferase	SHV-11
338	GCA_015284925.1	Guangdong	2020-11-09	II	CCWGG	methyltransferase	SHV-11/CTX-M-55/TEM-1
339	GCA_015290145.1	Guangdong	2020-11-09	II/III	CCWGG/CGCATC	methyltransferase	DHA-1
340	GCA_015277755.1	Zhejiang	2020-11-08	II	CCWGG	methyltransferase	SHV-11/CTX-M-65/LAP-2/KPC-2
341	GCA_015278055.1	Guangdong	2020-11-08	II	CCWGG	methyltransferase	SHV-217
342	GCA_015278095.1	Guangdong	2020-11-08	II	CCWGG	methyltransferase	SHV-11/CTX-M-14
343	GCA_015277975.1	Guangdong	2020-11-08	II	CCWGG	methyltransferase	SHV-1
344	GCA_015277995.1	Guangdong	2020-11-08	II	CCWGG	methyltransferase	SHV-11
345	GCA_015277935.1	Guangdong	2020-11-08	II	CCWGG	methyltransferase	SHV-1/TEM-1/CTX-M-3
346	GCA_015277915.1	Guangdong	2020-11-08	I/II	GATGNNNNNCTG/CCWGG	methyltransferase	SHV-1/CTX-M-55/OXA-1
347	GCA_015243235.1	Anhui	2020-11-05	II	CCWGG	methyltransferase	SHV-11/SHV-12/TEM-1/KPC-2/CTX-M-65/LAP-2
348	GCA_015238895.1	Beijing	2020-11-05	II	CCWGG	methyltransferase	SHV-11/KPC-2/CTX-M-65/LAP-2
349	GCA_015238555.1	Henan	2020-11-05	I/II	ACGNNNNNNCTG/CCWGG	methyltransferase	SHV-11/KPC-2/CTX-M-65/NDM-1
350	GCA_015219805.1	Hong Kong	2020-11-05	I/II	ACGNNNNNNCTG/CCWGG	restriction enzyme(II)/methyltransferase(I/II)	SHV-28/CTX-M-14/TEM-1/DHA-1
351	GCA_904865705.1	Australia	2020-10-30	I/II	GATGNNNNNCTG/CCWGG	methyltransferase	LEN-2
352	GCA_904866545.1	Australia	2020-10-30	II	CCWGG	methyltransferase	LEN-2
353	GCA_904864465.1	Australia	2020-10-30	II	CCWGG	methyltransferase	SHV-1/CTX-M-15/OXA-1/OXA-48/TEM-1/VEB-1
354	GCA_904866265.1	Australia	2020-10-30	I/II	GATGNNNNNCTG/ACGNNNNNNCTG/CCWGG	methyltransferase	LEN-2
355	GCA_904863355.1	Australia	2020-10-30	II	CCWGG	restriction enzyme/methyltransferase	SHV-1/CTX-M-15/OXA-1
356	GCA_904863285.1	Australia	2020-10-30	II	CCWGG	methyltransferase	SHV-33
357	GCA_904864645.1	Australia	2020-10-30	II	CCWGG	methyltransferase	SHV-11
358	GCA_904864475.1	Australia	2020-10-30	I/II	GATGNNNNNCTG/CCWGG	methyltransferase	SHV-33
359	GCA_904865685.1	Australia	2020-10-30	II	CCWGG	methyltransferase	SHV-1
360	GCA_904863175.1	Australia	2020-10-30	II	CCWGG	methyltransferase	SHV-11
361	GCA_904866475.1	Australia	2020-10-30	II	CCWGG	methyltransferase	SHV-11/TEM-1
362	GCA_904863335.1	Australia	2020-10-30	II	CCWGG	methyltransferase	SHV-28/CTX-M-62/SHV-2A/OXA-1
363	GCA_904866205.1	Australia	2020-10-30	II	CCWGG	methyltransferase	SHV-33
364	GCA_904864505.1	Australia	2020-10-30	II	CCWGG	methyltransferase	SHV-1
365	GCA_904866375.1	Australia	2020-10-30	II	CCWGG	methyltransferase	SHV-1
366	GCA_904863215.1	Australia	2020-10-30	II	CCWGG	restriction enzyme/methyltransferase	SHV-1/CTX-M-15/OXA-1/TEM-1
367	GCA_904866485.1	Australia	2020-10-30	II	CCWGG	restriction enzyme/methyltransferase	SHV-1/CTX-M-15/OXA-1
368	GCA_904863155.1	Australia	2020-10-30	I/II	GGCANNNNNNTTC/CCWGG	methyltransferase	LEN-27/SHV-12/TEM-1
369	GCA_015074925.1	Russia	2020-10-29	II	CCWGG	restriction enzyme/methyltransferase	SHV-11/CTX-M-15/OXA-1/TEM-1/OXA-48
370	GCA_014961485.1	Henan	2020-10-27	I/II	ACGNNNNNNCTG/CCWGG	methyltransferase	SHV-11/CTX-M-14/TEM-1/KPC-2/NDM-1
371	GCA_009661535.2	Russia	2020-10-13	II	CCWGG	methyltransferase	SHV-11/CTX-M-15/OXA-1/TEM-1
372	GCA_009661615.2	Russia	2020-10-13	II	CCWGG	restriction enzyme/methyltransferase	SHV-11/CTX-M-15/TEM-1
373	GCA_009661485.2	Russia	2020-10-13	II	CCWGG	methyltransferase	SHV-110/OXA-1/OXA-48/CTX-M-15
374	GCA_009661455.2	Russia	2020-10-13	II	CCWGG	methyltransferase	SHV-11/CTX-M-15/TEM-1
375	GCA_014883955.1	Colombia	2020-10-13	II	CCWGG	restriction enzyme/methyltransferase	SHV-42/CTX-M-15/KPC-2/TEM-1
376	GCA_009661415.2	Russia	2020-10-13	II	CCWGG	methyltransferase	SHV-36
377	GCA_015139975.1	Japan	2020-10-08	II	CCWGG	methyltransferase	SHV-1/CTX-M-15/TEM-1
378	GCA_015138775.1	Japan	2020-10-08	II	CCWGG	methyltransferase	SHV-1/CTX-M-14
379	GCA_014854815.1	Zhejiang	2020-10-06	II	CCWGG	methyltransferase	SHV-12/KPC-2/TEM-1/LAP-2/CTX-M-65
380	GCA_014826045.1	Israel	2020-09-30	II	CCWGG	methyltransferase	SHV-11/CTX-M-15
381	GCA_014840955.1	Henan	2020-10-04	II	CCWGG	methyltransferase	SHV-1/CTX-M-3/TEM-1
382	GCA_014788765.1	USA	2020-09-29	II	CCWGG	restriction enzyme/methyltransferase	SHV-11/CTX-M-15/CTX-M-2/OXA-10/OXA-1
383	GCA_014764345.1	Jiangsu	2020-09-27	I/II	ACGNNNNNNCTG/CCWGG	methyltransferase	SHV-11/VEB-3/NDM-1/TEM-1
384	GCA_014725775.1	Singapore	2020-09-24	II	CCWGG	restriction enzyme/methyltransferase	SHV-1/KP-2/TEM-1
385	GCA_014725895.1	Jiangsu	2020-09-24	I/II	GNAGNNNNRTDCA/CCWGG	methyltransferase	SHV-11/CTX-M-14/LAP-2/TEM-1/NDM-1
386	GCA_014905815.1	Japan	2020-09-23	II	CCWGG	restriction enzyme/methyltransferase	SHV-11/NDM-5/TEM-1/CTX-M-15
387	GCA_012029945.2	USA	2020-09-11	II	CCWGG	methyltransferase	SHV-11/KPC-3/TEM-1
388	GCA_012029975.2	USA	2020-09-11	II/III	CCWGG/CGCATC	restriction enzyme(II)/methyltransferase(II/III)	SHV-11/KPC-3/TEM-1/OXA-9
389	GCA_012029695.2	USA	2020-09-11	II/III	CCWGG/CGCATC	methyltransferase	SHV-28/KPC-3/TEM-1
390	GCA_012029935.2	USA	2020-09-11	II	CCWGG	methyltransferase	SHV-1/KPC-3
391	GCA_014524525.1	Brazil	2020-09-11	I/II	GATGNNNNNCTG/CCWGG	restriction enzyme(II)/methyltransferase(I/II)	SHV-28/CTX-M-15/KPC-2
392	GCA_012029895.2	USA	2020-09-11	II	CCWGG	restriction enzyme/methyltransferase	SHV-11/KPC-3
393	GCA_014495785.1	Germany	2020-09-09	I/II	CGATNNNNNNNGTTA/CCWGG	restriction enzyme(I)/methyltransferase(I/II)	SHV-11/OXA-181/CTX-M-15/TEM-1/OXA-1
394	GCA_014304835.1	Singapore	2020-08-26	I/II	GNAGNNNNRTDCA/CCWGG	restriction enzyme(II)/methyltransferase(I/II)	SHV-11/KPC-2/TEM-1
395	GCA_014189335.1	Canada	2020-08-14	II	CCWGG	restriction enzyme/methyltransferase	SHV-26/CMY-4/OXA-204/TEM-1
396	GCA_014170015.1	USA	2020-08-12	II	CCWGG	restriction enzyme/methyltransferase	SHV-11/CTX-M-15/TEM-1/KPC-2/OXA-1
397	GCA_014123345.1	Zhejiang	2020-08-10	II	CCWGG	methyltransferase	SHV-28/CTX-M-15/KPC-2
398	GCA_014108845.1	Shandong	2020-08-07	II	CCWGG	methyltransferase	SHV-11/CTX-M-14/TEM-1/LAP-2/KPC-2
399	GCA_011682835.2	Israel	2020-07-31	I/II	GATGNNNNNCTG/CCWGG	restriction enzyme(II)/methyltransferase(I/II)	SHV-187/OXA-1/CTX-M-15/TEM-1
400	GCA_011764365.2	Japan	2020-07-29	I/II	GATGNNNNNCTG/CCWGG	restriction enzyme(II)/methyltransferase(I/II)	SHV-11/CTX-M-15/DHA-1
401	GCA_013895695.1	United Kingdom	2020-07-29	II	CCWGG	restriction enzyme/methyltransferase	SHV-1
402	GCA_013811845.1	United Kingdom	2020-07-28	II	CCWGG	methyltransferase	SHV-71
403	GCA_013834745.1	United Kingdom	2020-07-28	II	CCWGG	methyltransferase	SHV-1
404	GCA_013791265.1	United Kingdom	2020-07-28	II/III	CCWGG/CGCATC	methyltransferase	SHV-1
405	GCA_013796245.1	United Kingdom	2020-07-28	II	CCWGG	methyltransferase	SHV-12
406	GCA_013813035.1	United Kingdom	2020-07-28	II	CCWGG	methyltransferase	SHV-27
407	GCA_013783245.1	United Kingdom	2020-07-28	II	CCWGG	methyltransferase	SHV-11
408	GCA_013782105.1	United Kingdom	2020-07-28	I/II	GATGNNNNNCTG(M)/CAAANNNNNNRTCA(R)/CCWGG	restriction enzyme(I)/methyltransferase(I/II)	SHV-26
409	GCA_013805705.1	United Kingdom	2020-07-28	II	CCWGG	methyltransferase	LEN-2
410	GCA_013811445.1	United Kingdom	2020-07-28	II	CCWGG	methyltransferase	SHV-11
411	GCA_013826045.1	United Kingdom	2020-07-28	II	CCWGG	methyltransferase	SHV-41
412	GCA_013792545.1	United Kingdom	2020-07-28	I/II	GAGNNNNNTCC(M)/CCWGG	restriction enzyme(II)/methyltransferase(I/II)	SHV-26
413	GCA_013735895.1	United Kingdom	2020-07-27	I/II	GNAGNNNNRTDCA/CCWGG	methyltransferase	SHV-37
414	GCA_013736155.1	United Kingdom	2020-07-27	I/II	ACGNNNNNNCTG/CCWGG	restriction enzyme(II)/methyltransferase(I/II)	SHV-187/CTX-M-15/TEM-1
415	GCA_013731305.1	United Kingdom	2020-07-27	II	CCWGG	methyltransferase	SHV-214/SHV-2A
416	GCA_013730675.1	United Kingdom	2020-07-27	II	CCWGG	methyltransferase	SHV-11
417	GCA_013749075.1	United Kingdom	2020-07-27	I/II	CCAYNNNNNTCC(I)/CCWGG	methyltransferase	SHV-11
418	GCA_013694425.1	USA	2020-07-26	I/II	CGATNNNNNNNGTTA(r)/ACGNNNNNNCTG（S/M）/CCWGG	specificity subunit(I)/restriction enzyme(I)/methyltransferase(I/II)	SHV-11/KPC-2/VIM-1
419	GCA_013694405.1	USA	2020-07-26	I/II	CGATNNNNNNNGTTA(r)/CCWGG	restriction enzyme(I)/methyltransferase(I/II)	SHV-11/CTX-M-15/NDM-1/OXA-1
420	GCA_013704985.1	United Kingdom	2020-07-24	II	CCWGG	methyltransferase	no
421	GCA_013611495.1	United Kingdom	2020-07-24	II	CCWGG	methyltransferase	SHV-36
422	GCA_014169375.1	Japan	2020-07-21	II	CCWGG	methyltransferase	SHV-60/CTX-M-14/LAP-2
423	GCA_014169335.1	Japan	2020-07-21	II	CCWGG	methyltransferase	SHV-28/CTX-M-14
424	GCA_014170935.1	Japan	2020-07-21	I/II	GATGNNNNNCTG/ACGNNNNNNCTG/CCWGG	restriction enzyme(II)/methyltransferase(I/II)	SHV-187/CTX-M-2/OXA-10/TEM-1/DHA-1/IMP-1
425	GCA_014168575.1	Japan	2020-07-21	II	CCWGG	restriction enzyme/methyltransferase	SHV-1/TEM-1/CTX-M-15
426	GCA_013423825.1	Guangdong	2020-07-19	II/III	CCWGG/CGCATC	methyltransferase	SHV-11/CTX-M-3/TEM-1/DHA-1
427	GCA_013416105.1	Switzerland	2020-07-15	II	CCWGG	methyltransferase	SHV-11/OXA-1/OXA-48
428	GCA_013416085.1	Switzerland	2020-07-15	II	CCWGG	methyltransferase	SHV-11/TEM-1/DHA-1/OXA-48/OXA-1
